# Supplementary material for: Genomic Characterization Provides New Insights for Detailed Phage- Resistant Mechanism for Brucella abortus
Source: Front Microbiol. 2019 May 3;10:917. doi: 10.3389/fmicb.2019.00917 (PMC6510165; doi:10.3389/fmicb.2019.00917)
Supplement: Supplementary file 1 [file Data_Sheet_1.xlsx]

## Sheet: Table S1
Table S1 MLST typing result of strians.
NO.	Strains	gap	aroA	glk	dnaK	gyrB	trpE	cobQ	omp25	int_hyp	ST
1	B. abortus 01-0065	2	1	1	2	1	3	1	1	1	1
2	B. abortus 01-0585	2	1	1	2	1	3	1	1	1	1
3	B. abortus 01-0648	2	1	1	2	1	3	1	1	1	1
4	B. abortus 01-4165	2	1	1	2	1	3	1	1	1	1
5	B. abortus 03-2770-11	2	1	1	2	1	3	1	1	1	1
6	B. abortus 225-65	2	1	1	2	1	3	1	1	1	1
7	B. abortus 292	2	1	1	2	1	3	1	1	1	1
8	B. abortus 544	2	1	1	2	1	3	1	1	1	1
9	B. abortus 600-64	2	1	1	2	1	3	1	1	1	1
10	B. abortus 63-168	2	1	1	2	1	3	1	1	1	1
11	B. abortus 63-59	2	1	1	2	1	3	1	1	1	1
12	B. abortus 64-108	2	1	1	2	1	3	1	1	1	1
13	B. abortus 67-781	2	1	1	2	1	3	1	1	1	1
14	B. abortus 68-3396P	2	1	1	2	1	3	1	1	1	1
15	B. abortus 76-1413	2	1	1	2	1	3	1	1	1	1
16	B. abortus 80-108	2	1	1	2	1	3	1	1	1	1
17	B. abortus 84-0928	2	1	1	2	1	3	1	1	1	1
18	B. abortus 85-1058	2	1	1	2	1	3	1	1	1	1
19	B. abortus 863-67	2	1	1	2	1	3	1	1	1	1
20	B. abortus 87-0095	2	1	1	2	1	3	1	1	1	1
21	B. abortus 88-19	2	1	1	2	1	3	1	1	1	1
22	B. abortus 88-226	2	1	1	2	1	3	1	1	1	1
23	B. abortus 89-2646-1238	2	1	1	2	1	3	1	1	1	1
24	B. abortus 90-0737	2	1	1	2	1	3	1	1	1	1
25	B. abortus 90-0962	2	1	1	2	1	3	1	1	1	1
26	B. abortus 90-1280	2	1	1	2	1	3	1	1	1	1
27	B. abortus 90-50	2	1	1	2	1	3	1	1	1	1
28	B. abortus 93-1	2	1	1	2	1	3	1	1	1	1
29	B. abortus 94-1313	2	1	1	2	1	3	1	1	1	1
30	B. abortus 9-941	2	1	1	2	1	3	1	1	1	1
31	B. abortus B10-0018	2	1	1	2	1	3	1	1	1	1
32	B. abortus B10-0091	2	1	1	2	1	3	1	1	1	1
33	B. abortus B10-0973	2	1	1	2	1	3	1	1	1	1
34	B. abortus CNGB1011	2	1	1	2	1	3	1	1	1	1
35	B. abortus CNGB1432	2	1	1	2	1	3	1	1	1	1
36	B. abortus CNGB308	2	1	1	2	1	3	1	1	1	1
37	B. abortus CNGB436	2	1	1	2	1	3	1	1	1	1
38	B. abortus CNGB752	2	1	1	2	1	3	1	1	1	1
39	B. abortus CNGB759	2	1	1	2	1	3	1	1	1	1
40	B. abortus CNGB966	2	1	1	2	1	3	1	1	1	1
41	B. abortus F1-06B1	2	1	1	2	1	3	1	1	1	1
42	B. abortus F2-06-8	2	1	1	2	1	3	1	1	1	1
43	B. abortus F3-01-300	2	1	1	2	1	3	1	1	1	1
44	B. abortus F3-07-1	2	1	1	2	1	3	1	1	1	1
45	B. abortus I103_(UK3-01)	2	1	1	2	1	3	1	1	1	1
46	B. abortus NI016	2	1	1	2	1	3	1	1	1	1
47	B. abortus NI240	2	1	1	2	1	3	1	1	1	1
48	B. abortus NI274	2	1	1	2	1	3	1	1	1	1
49	B. abortus NI352	2	1	1	2	1	3	1	1	1	1
50	B. abortus NI380	2	1	1	2	1	3	1	1	1	1
51	B. abortus NI388	2	1	1	2	1	3	1	1	1	1
52	B. abortus NI422	2	1	1	2	1	3	1	1	1	1
53	B. abortus NI492	2	1	1	2	1	3	1	1	1	1
54	B. abortus NI495a	2	1	1	2	1	3	1	1	1	1
55	B. abortus NI518	2	1	1	2	1	3	1	1	1	1
56	B. abortus NI593	2	1	1	2	1	3	1	1	1	1
57	B. abortus NI613	2	1	1	2	1	3	1	1	1	1
58	B. abortus NI622	2	1	1	2	1	3	1	1	1	1
59	B. abortus NI628	2	1	1	2	1	3	1	1	1	1
60	B. abortus NI633	2	1	1	2	1	3	1	1	1	1
61	B. abortus NI639	2	1	1	2	1	3	1	1	1	1
62	B. abortus NI645	2	1	1	2	1	3	1	1	1	1
63	B. abortus NI649	2	1	1	2	1	3	1	1	1	1
64	B. abortus 9-941	2	1	1	2	1	3	1	1	1	1
65	B. abortus 355-78	2	1	2	2	1	3	1	1	1	2
66	B. abortus 63-130	2	1	2	2	1	3	1	1	1	2
67	B. abortus 63-138	2	1	2	2	1	3	1	1	1	2
68	B. abortus 63-144	2	1	2	2	1	3	1	1	1	2
69	B. abortus 64-122	2	1	2	2	1	3	1	1	1	2
70	B. abortus 65-157	2	1	2	2	1	3	1	1	1	2
71	B. abortus 67-93	2	1	2	2	1	3	1	1	1	2
72	B. abortus 80-102	2	1	2	2	1	3	1	1	1	2
73	B. abortus 8416	2	1	2	2	1	3	1	1	1	2			susceptibilities
74	B. abortus 85-140	2	1	2	2	1	3	1	1	1	2
75	B. abortus 877-67	2	1	2	2	1	3	1	1	1	2
76	B. abortus 90-12178	2	1	2	2	1	3	1	1	1	2
77	B. abortus F10-06-3	2	1	2	2	1	3	1	1	1	2
78	B. abortus F5-04-7	2	1	2	2	1	3	1	1	1	2
79	B. abortus LEVI237	2	1	2	2	1	3	1	1	1	2
80	B. abortus R42-08	2	1	2	2	1	3	1	1	1	2
81	B. abortus 2308	2	1	1	2	1	4	1	1	1	5
82	B. abortus 64-81	2	1	1	2	1	4	1	1	1	5
83	B. abortus 65-63	2	1	1	2	1	4	1	1	1	5
84	B. abortus 80-1399	2	1	1	2	1	4	1	1	1	5
85	B. abortus 82-2330	2	1	1	2	1	4	1	1	1	5
86	B. abortus 87-2211	2	1	1	2	1	4	1	1	1	5
87	B. abortus 89-0363	2	1	1	2	1	4	1	1	1	5
88	B. abortus 90-0742	2	1	1	2	1	4	1	1	1	5
89	B. abortus A13334	2	1	1	2	1	4	1	1	1	5
90	B. abortus RB51-AHVLA	2	1	1	2	1	4	1	1	1	5
91	B. abortus S19	2	1	1	2	1	4	1	1	1	5
92	B. abortus F1-06-B21	5	7	10	7	6	3	7	1	1	6
93	B. abortus 104M	1	6	4	1	4	3	5	2	1	14
94	B. abortus 80-28	5	7	4	7	1	3	7	1	1	-
95	B. abortus A13334	2	1	4	1	2	1	1	1	1	-
"-" means unknow Sequence type;the strains typing here are owning contigs less than 12.

## Sheet: Table S2
Table S2 Details of SNPs between B. abortus 8416 and 9-941
No.	Gene name	Conservative property	Gene start	Gene End	SNP location	SNPcoord	Refbase	SNPbase	Ref codon	SNP codon	SNP Type	Annotation
1	BruAb1_0027	N	31470	33170	1381	32850	A	G	ATC->I	GTC->V	non-synonymous	30S ribosomal protein S1
2	BruAb1_0027	N	31470	33170	1564	33033	A	C	AGC->S	CGC->R	non-synonymous	30S ribosomal protein S1
3	BruAb1_0037	N	42935	42072	709	42227	C	T	GCA->A	ACA->T	non-synonymous	prephenate dehydratase
4	BruAb1_0037	N	42935	42072	438	42498	G	T	GCC->A	GCA->A	synonymous	prephenate dehydratase
5	BruAb1_0048	N	51831	53750	13	51843	A	G	ACG->T	GCG->A	non-synonymous	hypothetical protein
6	BruAb1_0048	N	51831	53750	657	52487	T	C	AAT->N	AAC->N	synonymous	hypothetical protein
7	BruAb1_0049	N	53747	58486	1617	55363	A	G	GTA->V	GTG->V	synonymous	hypothetical protein
8	BruAb1_0049	N	53747	58486	4026	57772	G	A	ACG->T	ACA->T	synonymous	hypothetical protein
9	BruAb1_0069	N	75772	72539	1291	74482	G	A	CTG->L	TTG->L	synonymous	error-prone DNA polymerase
10	BruAb1_0069	N	75772	72539	1107	74666	C	A	GAG->E	GAT->D	non-synonymous	error-prone DNA polymerase
11	BruAb1_0069	N	75772	72539	586	75187	C	T	GAC->D	AAC->N	non-synonymous	error-prone DNA polymerase
12	BruAb1_0071	N	78112	77249	207	77906	A	C	GAT->D	GAG->E	non-synonymous	hypothetical protein
13	BruAb1_0071	N	78112	77249	108	78005	C	T	GGG->G	GGA->G	synonymous	hypothetical protein
14	BruAb1_0072	N	80281	82551	26	80306	C	G	GCT->A	GGT->G	non-synonymous	hypothetical protein
15	BruAb1_0072	N	80281	82551	60	80340	A	T	GCA->A	GCT->A	synonymous	hypothetical protein
16	BruAb1_0072	N	80281	82551	72	80352	T	C	ACT->T	ACC->T	synonymous	hypothetical protein
17	BruAb1_0072	N	80281	82551	75	80355	G	T	TCG->S	TCT->S	synonymous	hypothetical protein
18	BruAb1_0072	N	80281	82551	90	80370	C	T	AAC->N	AAT->N	synonymous	hypothetical protein
19	BruAb1_0072	N	80281	82551	173	80453	C	G	GCA->A	GGA->G	non-synonymous	hypothetical protein
20	BruAb1_0072	N	80281	82551	524	80804	T	C	ATG->M	ACG->T	non-synonymous	hypothetical protein
21	BruAb1_0072	N	80281	82551	568	80848	C	A	CAT->H	AAT->N	non-synonymous	hypothetical protein
22	BruAb1_0072	N	80281	82551	570	80850	T	G	CAT->H	CAG->Q	non-synonymous	hypothetical protein
23	BruAb1_0072	N	80281	82551	575	80855	C	A	ACT->T	AAT->N	non-synonymous	hypothetical protein
24	BruAb1_0072	N	80281	82551	576	80856	T	G	ACT->T	ACG->T	synonymous	hypothetical protein
25	BruAb1_0072	N	80281	82551	578	80858	G	A	GGC->G	GAC->D	non-synonymous	hypothetical protein
26	BruAb1_0072	N	80281	82551	591	80871	C	T	AAC->N	AAT->N	synonymous	hypothetical protein
27	BruAb1_0072	N	80281	82551	598	80878	C	T	CCA->P	TCA->S	non-synonymous	hypothetical protein
28	BruAb1_0072	N	80281	82551	907	81187	C	A	CAT->H	AAT->N	non-synonymous	hypothetical protein
29	BruAb1_0072	N	80281	82551	909	81189	T	G	CAT->H	CAG->Q	non-synonymous	hypothetical protein
30	BruAb1_0072	N	80281	82551	914	81194	C	A	ACT->T	AAT->N	non-synonymous	hypothetical protein
31	BruAb1_0072	N	80281	82551	915	81195	T	G	ACT->T	ACG->T	synonymous	hypothetical protein
32	BruAb1_0072	N	80281	82551	917	81197	G	A	GGC->G	GAC->D	non-synonymous	hypothetical protein
33	BruAb1_0072	N	80281	82551	930	81210	C	T	AAC->N	AAT->N	synonymous	hypothetical protein
34	BruAb1_0072	N	80281	82551	937	81217	C	T	CCA->P	TCA->S	non-synonymous	hypothetical protein
35	BruAb1_0072	N	80281	82551	954	81234	G	C	ACG->T	ACC->T	synonymous	hypothetical protein
36	BruAb1_0072	N	80281	82551	966	81246	G	C	GCG->A	GCC->A	synonymous	hypothetical protein
37	BruAb1_0074	Y	84607	83387	472	84136	T	C	ACG->T	GCG->A	non-synonymous	argininosuccinate synthase
38	BruAb1_0074	N	84607	83387	180	84428	G	A	ATC->I	ATT->I	synonymous	argininosuccinate synthase
39	BruAb1_0086	N	95087	95824	597	95683	G	A	ACG->T	ACA->T	synonymous	hypothetical protein
40	BruAb1_0086	N	95087	95824	636	95722	C	T	GCC->A	GCT->A	synonymous	hypothetical protein
41	BruAb1_0107	Y	114111	115190	935	115045	G	C	GGC->G	GCC->A	non-synonymous	sulfate ABC transporter ATP-binding protein
42	BruAb1_0107	Y	114111	115190	936	115046	C	G	GGC->G	GGG->G	synonymous	sulfate ABC transporter ATP-binding protein
43	BruAb1_0108	N	115576	124179	27	115602	A	C	TCA->S	TCC->S	synonymous	cyclic beta 1-2 glucan synthetase
44	BruAb1_0108	N	115576	124179	6818	122393	C	T	GCA->A	GTA->V	non-synonymous	cyclic beta 1-2 glucan synthetase
45	BruAb1_0108	N	115576	124179	7472	123047	T	C	TTC->F	TCC->S	non-synonymous	cyclic beta 1-2 glucan synthetase
46	BruAb1_0121	N	139394	141274	269	139662	C	T	GCG->A	GTG->V	non-synonymous	DEAD/DEAH box helicase
47	BruAb1_0121	N	139394	141274	1300	140693	G	C	GTA->V	CTA->L	non-synonymous	DEAD/DEAH box helicase
48	BruAb1_0132	N	151885	152322	42	151926	T	G	GGT->G	GGG->G	synonymous	IS711, transposase orfB
49	BruAb1_0132	N	151885	152322	153	152037	C	A	TCC->S	TCA->S	synonymous	IS711, transposase orfB
50	BruAb1_0132	N	151885	152322	257	152141	T	C	GTC->V	GCC->A	non-synonymous	IS711, transposase orfB
51	BruAb1_0146	N	169939	169046	359	169581	A	G	CTG->L	CCG->P	non-synonymous	RNA methyltransferase
52	BruAb1_0146	N	169939	169046	280	169660	T	C	ACA->T	GCA->A	non-synonymous	RNA methyltransferase
53	BruAb1_0175	N	191571	193004	747	192317	G	A	ATG->M	ATA->I	non-synonymous	siroheme synthase CysG
54	BruAb1_0175	N	191571	193004	899	192469	G	A	CGG->R	CAG->Q	non-synonymous	siroheme synthase CysG
55	BruAb1_0184	N	198539	202324	2406	200944	A	C	ATA->I	ATC->I	synonymous	B12-dependent methionine synthase
56	BruAb1_0184	N	198539	202324	2964	201502	C	T	GCC->A	GCT->A	synonymous	B12-dependent methionine synthase
57	BruAb1_0195	N	212128	213639	245	212372	T	C	CTG->L	CCG->P	non-synonymous	glycerol-3-phosphate dehydrogenase
58	BruAb1_0195	N	212128	213639	554	212681	G	A	GGC->G	GAC->D	non-synonymous	glycerol-3-phosphate dehydrogenase
59	BruAb1_0210	Y	227341	226571	743	226599	G	T	ACC->T	AAC->N	non-synonymous	thiazole synthase
60	BruAb1_0210	Y	227341	226571	742	226600	T	G	ACC->T	CCC->P	non-synonymous	thiazole synthase
61	BruAb1_0213	N	229416	228541	667	228750	T	C	AAC->N	GAC->D	non-synonymous	phosphomethylpyrimidine kinase
62	BruAb1_0213	N	229416	228541	487	228930	G	T	CTC->L	ATC->I	non-synonymous	phosphomethylpyrimidine kinase
63	BruAb1_0213	N	229416	228541	40	229377	C	T	GAT->D	AAT->N	non-synonymous	phosphomethylpyrimidine kinase
64	BruAb1_0230	N	248476	249795	264	248739	A	C	ATA->I	ATC->I	synonymous	sugar ABC transporter periplasmic sugar-binding protein
65	BruAb1_0230	Y	248476	249795	533	249008	C	T	ACC->T	ATC->I	non-synonymous	sugar ABC transporter periplasmic sugar-binding protein
66	BruAb1_0233	N	251665	252756	502	252166	C	A	CTG->L	ATG->M	non-synonymous	sugar ABC transporter ATP-binding protein
67	BruAb1_0233	N	251665	252756	995	252659	C	T	CCG->P	CTG->L	non-synonymous	sugar ABC transporter ATP-binding protein
68	BruAb1_0265	N	276017	275532	95	275923	G	T	TCT->S	TAT->Y	non-synonymous	hypothetical protein
69	BruAb1_0265	Y	276017	275532	10	276008	T	A	AAA->K	TAA->*	non-synonymous	hypothetical protein
70	BruAb1_0265	Y	276017	275532	9	276009	A	T	AAT->N	AAA->K	non-synonymous	hypothetical protein
71	BruAb1_0272	Y	278956	279288	83	279038	A	C	AAC->N	ACC->T	non-synonymous	hypothetical protein
72	BruAb1_0272	Y	278956	279288	84	279039	C	A	AAC->N	AAA->K	non-synonymous	hypothetical protein
73	BruAb1_0280	N	284876	283584	995	283882	G	A	GCC->A	GTC->V	non-synonymous	histidinol dehydrogenase
74	BruAb1_0280	N	284876	283584	132	284745	C	T	GAG->E	GAA->E	synonymous	histidinol dehydrogenase
75	BruAb1_0324	N	332115	333431	329	332443	T	C	GTG->V	GCG->A	non-synonymous	sensor histidine kinase
76	BruAb1_0324	N	332115	333431	435	332549	T	C	GGT->G	GGC->G	synonymous	sensor histidine kinase
77	BruAb1_0342	N	352550	349026	967	351584	G	T	CTG->L	ATG->M	non-synonymous	sensor histidine kinase/response regulator
78	BruAb1_0342	N	352550	349026	488	352063	C	T	GGC->G	GAC->D	non-synonymous	sensor histidine kinase/response regulator
79	BruAb1_0363	N	368844	367816	499	368346	T	G	ACT->T	CCT->P	non-synonymous	proline racemase
80	BruAb1_0363	N	368844	367816	273	368572	A	G	GGT->G	GGC->G	synonymous	proline racemase
81	BruAb1_0367	N	371575	372894	395	371969	A	G	TAT->Y	TGT->C	non-synonymous	sensor histidine kinase
82	BruAb1_0367	N	371575	372894	820	372394	A	G	ACC->T	GCC->A	non-synonymous	sensor histidine kinase
83	BruAb1_0375	N	379960	381438	1062	381021	T	C	CGT->R	CGC->R	synonymous	xanthine dehydrogenase
84	BruAb1_0375	N	379960	381438	1126	381085	G	C	GCC->A	CCC->P	non-synonymous	xanthine dehydrogenase
85	BruAb1_0458	N	456717	458648	1170	457886	C	T	GCC->A	GCT->A	synonymous	1-deoxy-D-xylulose-5-phosphate synthase
86	BruAb1_0458	N	456717	458648	1711	458427	A	G	AGC->S	GGC->G	non-synonymous	1-deoxy-D-xylulose-5-phosphate synthase
87	BruAb1_0464	N	463471	465357	746	464216	T	G	TTC->F	TGC->C	non-synonymous	ABC transporter ATP-binding protein/permease
88	BruAb1_0464	N	463471	465357	1611	465081	C	A	GAC->D	GAA->E	non-synonymous	ABC transporter ATP-binding protein/permease
89	BruAb1_0464	N	463471	465357	1732	465202	T	C	TGC->C	CGC->R	non-synonymous	ABC transporter ATP-binding protein/permease
90	BruAb1_0475	N	476715	475759	633	476083	G	A	CGC->R	CGT->R	synonymous	hypothetical protein
91	BruAb1_0475	N	476715	475759	609	476107	T	C	CTA->L	CTG->L	synonymous	hypothetical protein
92	BruAb1_0475	N	476715	475759	318	476398	C	T	CTG->L	CTA->L	synonymous	hypothetical protein
93	BruAb1_0489	N	487674	488528	88	487761	G	A	GCA->A	ACA->T	non-synonymous	cytochrome c oxidase subunit II CoxB
94	BruAb1_0489	N	487674	488528	484	488157	T	C	TCC->S	CCC->P	non-synonymous	cytochrome c oxidase subunit II CoxB
95	BruAb1_0490	Y	488666	490324	930	489595	C	T	GGC->G	GGT->G	synonymous	cytochrome c oxidase subunit I CoxA
96	BruAb1_0490	N	488666	490324	1646	490311	C	T	CCG->P	CTG->L	non-synonymous	cytochrome c oxidase subunit I CoxA
97	BruAb1_0500	N	497739	497254	425	497315	G	A	ACC->T	ATC->I	non-synonymous	ahpC/TSA family protein
98	BruAb1_0500	N	497739	497254	204	497536	A	G	GGT->G	GGC->G	synonymous	ahpC/TSA family protein
99	BruAb1_0503	N	502472	499578	1866	500607	A	C	CTT->L	CTG->L	synonymous	sensory box protein
100	BruAb1_0503	N	502472	499578	310	502163	T	G	AGG->R	CGG->R	synonymous	sensory box protein
101	BruAb1_0550	N	546070	546507	42	546111	G	T	GGG->G	GGT->G	synonymous	IS711, transposase orfB
102	BruAb1_0550	N	546070	546507	94	546163	A	C	AGA->R	CGA->R	synonymous	IS711, transposase orfB
103	BruAb1_0550	N	546070	546507	159	546228	A	G	TTA->L	TTG->L	synonymous	IS711, transposase orfB
104	BruAb1_0550	N	546070	546507	171	546240	T	G	GGT->G	GGG->G	synonymous	IS711, transposase orfB
105	BruAb1_0550	N	546070	546507	229	546298	A	G	AAT->N	GAT->D	non-synonymous	IS711, transposase orfB
106	BruAb1_0550	N	546070	546507	245	546314	A	C	GAT->D	GCT->A	non-synonymous	IS711, transposase orfB
107	BruAb1_0553	N	548054	548422	21	548074	G	A	CTG->L	CTA->L	synonymous	IS5 family transposase OrfA
108	BruAb1_0553	N	548054	548422	306	548359	C	G	ACC->T	ACG->T	synonymous	IS5 family transposase OrfA
109	BruAb1_0560	N	551254	552609	718	551971	C	G	CAC->H	GAC->D	non-synonymous	phosphomannomutase
110	BruAb1_0560	N	551254	552609	887	552140	C	T	ACT->T	ATT->I	non-synonymous	phosphomannomutase
111	BruAb1_0570	N	565853	564402	1375	564479	G	A	CAG->Q	TAG->*	non-synonymous	xylulokinase
112	BruAb1_0570	N	565853	564402	1133	564721	C	A	CGT->R	CTT->L	non-synonymous	xylulokinase
113	BruAb1_0606	N	600093	601235	562	600654	A	G	AAC->N	GAC->D	non-synonymous	terminase large subunit
114	BruAb1_0606	N	600093	601235	1002	601094	G	A	GCG->A	GCA->A	synonymous	terminase large subunit
115	BruAb1_0632	N	623859	625262	200	624058	T	C	CTG->L	CCG->P	non-synonymous	sensor histidine kinase
116	BruAb1_0632	N	623859	625262	913	624771	A	G	ACC->T	GCC->A	non-synonymous	sensor histidine kinase
117	BruAb1_0636	N	636156	633505	1518	634639	C	T	ATG->M	ATA->I	non-synonymous	aminopeptidase
118	BruAb1_0636	N	636156	633505	1512	634645	T	C	AAA->K	AAG->K	synonymous	aminopeptidase
119	BruAb1_0661	N	658952	656895	2044	656909	G	A	CAT->H	TAT->Y	non-synonymous	transglycosylase
120	BruAb1_0661	N	658952	656895	129	658824	G	A	CCC->P	CCT->P	synonymous	transglycosylase
121	BruAb1_0691	N	682355	682969	119	682473	G	C	TGT->C	TCT->S	non-synonymous	amino acid transporter LysE
122	BruAb1_0691	N	682355	682969	487	682841	A	G	AGT->S	GGT->G	non-synonymous	amino acid transporter LysE
123	BruAb1_0726	N	714622	716748	690	715311	C	A	GAC->D	GAA->E	non-synonymous	oxidoreductase
124	BruAb1_0726	N	714622	716748	1352	715973	G	A	GGC->G	GAC->D	non-synonymous	oxidoreductase
125	BruAb1_0726	N	714622	716748	1563	716184	A	G	CTA->L	CTG->L	synonymous	oxidoreductase
126	BruAb1_0737	N	726538	724865	1214	725325	G	A	ACC->T	ATC->I	non-synonymous	L-lactate permease
127	BruAb1_0737	N	726538	724865	1174	725365	T	C	AAA->K	GAA->E	non-synonymous	L-lactate permease
128	BruAb1_0737	N	726538	724865	777	725762	C	T	GCG->A	GCA->A	synonymous	L-lactate permease
129	BruAb1_0737	N	726538	724865	591	725948	T	C	CAA->Q	CAG->Q	synonymous	L-lactate permease
130	BruAb1_0748	N	737456	739147	424	737879	T	G	TGT->C	GGT->G	non-synonymous	hypothetical protein
131	BruAb1_0748	Y	737456	739147	686	738141	T	A	TTA->L	TAA->*	non-synonymous	hypothetical protein
132	BruAb1_0748	Y	737456	739147	687	738142	A	T	TTA->L	TTT->F	non-synonymous	hypothetical protein
133	BruAb1_0748	N	737456	739147	745	738200	A	G	AAC->N	GAC->D	non-synonymous	hypothetical protein
134	BruAb1_0796	N	787849	786311	1322	786528	T	G	GAG->E	GCG->A	non-synonymous	sugar transferase
135	BruAb1_0796	N	787849	786311	1242	786608	G	A	AAC->N	AAT->N	synonymous	sugar transferase
136	BruAb1_0839	N	824042	827533	1685	825726	C	T	TCC->S	TTC->F	non-synonymous	DNA polymerase III subunit alpha
137	BruAb1_0839	N	824042	827533	2563	826604	A	G	AGT->S	GGT->G	non-synonymous	DNA polymerase III subunit alpha
138	BruAb1_0839	N	824042	827533	2719	826760	C	T	CGG->R	TGG->W	non-synonymous	DNA polymerase III subunit alpha
139	BruAb1_0881	N	863844	863173	640	863205	G	A	CAA->Q	TAA->*	non-synonymous	hypothetical protein
140	BruAb1_0881	N	863844	863173	636	863209	C	T	GAG->E	GAA->E	synonymous	hypothetical protein
141	BruAb1_0883	N	864480	864758	121	864600	C	A	CGA->R	AGA->R	synonymous	hypothetical protein
142	BruAb1_0883	N	864480	864758	214	864693	A	G	ACG->T	GCG->A	non-synonymous	hypothetical protein
143	BruAb1_0884	N	865130	865933	99	865228	G	A	CTG->L	CTA->L	synonymous	ExoR, exopolysacchride production negative regulator
144	BruAb1_0884	N	865130	865933	324	865453	C	A	GAC->D	GAA->E	non-synonymous	ExoR, exopolysacchride production negative regulator
145	BruAb1_0890	N	871623	874595	685	872307	G	A	GCA->A	ACA->T	non-synonymous	hypothetical protein
146	BruAb1_0890	N	871623	874595	1077	872699	C	T	GCC->A	GCT->A	synonymous	hypothetical protein
147	BruAb1_0912	Y	896333	896836	55	896387	G	C	GTC->V	CTC->L	non-synonymous	acetyltransferase
148	BruAb1_0912	N	896333	896836	465	896797	A	G	GTA->V	GTG->V	synonymous	acetyltransferase
149	BruAb1_0929	N	914305	914739	183	914487	C	T	GAC->D	GAT->D	synonymous	IS711, transposase orfB
150	BruAb1_0929	N	914305	914739	186	914490	G	A	GCG->A	GCA->A	synonymous	IS711, transposase orfB
151	BruAb1_0929	N	914305	914739	226	914530	G	A	GAT->D	AAT->N	non-synonymous	IS711, transposase orfB
152	BruAb1_0938	N	924086	923412	504	923583	A	C	CTT->L	CTG->L	synonymous	hypothetical protein
153	BruAb1_0938	N	924086	923412	135	923952	A	G	ATT->I	ATC->I	synonymous	hypothetical protein
154	BruAb1_0944	N	930610	931029	201	930810	C	T	CTC->L	CTT->L	synonymous	hypothetical protein
155	BruAb1_0944	N	930610	931029	344	930953	C	T	GCC->A	GTC->V	non-synonymous	hypothetical protein
156	BruAb1_0954	N	937752	939122	139	937890	T	C	TCC->S	CCC->P	non-synonymous	outer membrane efflux family protein
157	BruAb1_0954	N	937752	939122	519	938270	T	C	CTT->L	CTC->L	synonymous	outer membrane efflux family protein
158	BruAb1_0954	N	937752	939122	859	938610	G	A	GCA->A	ACA->T	non-synonymous	outer membrane efflux family protein
159	BruAb1_0984	N	963848	964282	91	963938	A	C	AGA->R	CGA->R	synonymous	IS711, transposase orfB
160	BruAb1_0984	N	963848	964282	226	964073	A	G	AAT->N	GAT->D	non-synonymous	IS711, transposase orfB
161	BruAb1_0984	N	963848	964282	242	964089	A	C	GAT->D	GCT->A	non-synonymous	IS711, transposase orfB
162	BruAb1_1006	N	983585	984508	345	983929	A	G	ATA->I	ATG->M	non-synonymous	hypothetical protein
163	BruAb1_1006	N	983585	984508	877	984461	T	G	TGG->W	GGG->G	non-synonymous	hypothetical protein
164	BruAb1_1006	N	983585	984508	884	984468	C	T	CCC->P	CTC->L	non-synonymous	hypothetical protein
165	BruAb1_1017	N	992592	993986	639	993230	C	T	ATC->I	ATT->I	synonymous	glutathione reductase
166	BruAb1_1017	N	992592	993986	733	993324	A	C	ATT->I	CTT->L	non-synonymous	glutathione reductase
167	BruAb1_1018	N	994195	995574	48	994242	A	G	AGA->R	AGG->R	synonymous	phospho-2-dehydro-3-deoxyheptonate aldolase
168	BruAb1_1018	N	994195	995574	505	994699	T	C	TGC->C	CGC->R	non-synonymous	phospho-2-dehydro-3-deoxyheptonate aldolase
169	BruAb1_1018	N	994195	995574	1110	995304	C	G	CGC->R	CGG->R	synonymous	phospho-2-dehydro-3-deoxyheptonate aldolase
170	BruAb1_1021	N	997794	999167	192	997985	G	A	CTG->L	CTA->L	synonymous	glutamyl-tRNA synthetase
171	BruAb1_1021	N	997794	999167	330	998123	T	G	TTT->F	TTG->L	non-synonymous	glutamyl-tRNA synthetase
172	BruAb1_1022	N	1002305	999981	1242	1001064	C	T	GCG->A	GCA->A	synonymous	malic enzyme
173	BruAb1_1022	N	1002305	999981	723	1001583	A	G	CTT->L	CTC->L	synonymous	malic enzyme
174	BruAb1_1029	N	1012339	1007678	2709	1009631	G	T	AGC->S	AGA->R	non-synonymous	hypothetical protein
175	BruAb1_1029	N	1012339	1007678	2063	1010277	A	G	GTA->V	GCA->A	non-synonymous	hypothetical protein
176	BruAb1_1039	N	1019903	1018443	361	1019543	A	G	TCC->S	CCC->P	non-synonymous	hypothetical protein
177	BruAb1_1039	N	1019903	1018443	360	1019544	A	G	GCT->A	GCC->A	synonymous	hypothetical protein
178	BruAb1_1039	N	1019903	1018443	213	1019691	T	C	TCA->S	TCG->S	synonymous	hypothetical protein
179	BruAb1_1044	N	1022936	1025773	251	1023186	G	A	AGG->R	AAG->K	non-synonymous	sensory box histidine kinase/response regulator
180	BruAb1_1044	N	1022936	1025773	847	1023782	C	G	CCG->P	GCG->A	non-synonymous	sensory box histidine kinase/response regulator
181	BruAb1_1088	N	1072043	1071663	281	1071763	C	T	AGA->R	AAA->K	non-synonymous	hypothetical protein
182	BruAb1_1088	N	1072043	1071663	271	1071773	T	G	AGT->S	CGT->R	non-synonymous	hypothetical protein
183	BruAb1_1088	N	1072043	1071663	26	1072018	C	T	CGC->R	CAC->H	non-synonymous	hypothetical protein
184	BruAb1_1105	N	1091849	1091271	541	1091309	A	G	TAT->Y	CAT->H	non-synonymous	guanylate kinase
185	BruAb1_1105	Y	1091849	1091271	166	1091684	G	A	CAT->H	TAT->Y	non-synonymous	guanylate kinase
186	BruAb1_1112	N	1100907	1098469	1469	1099439	A	C	GTT->V	GGT->G	non-synonymous	Lon, ATP-dependent protease La
187	BruAb1_1112	N	1100907	1098469	4	1100904	T	C	ACG->T	GCG->A	non-synonymous	Lon, ATP-dependent protease La
188	BruAb1_1151	N	1142863	1140332	1591	1141273	A	G	TCG->S	CCG->P	non-synonymous	ComEC/Rec2 family protein
189	BruAb1_1151	N	1142863	1140332	198	1142666	T	C	CTA->L	CTG->L	synonymous	ComEC/Rec2 family protein
190	BruAb1_1193	N	1179243	1180775	87	1179329	C	A	GGC->G	GGA->G	synonymous	propionlyl-CoA carboxylase
191	BruAb1_1193	Y	1179243	1180775	732	1179974	C	T	TTC->F	TTT->F	synonymous	propionlyl-CoA carboxylase
192	BruAb1_1219	N	1209774	1209304	463	1209312	C	A	GCC->A	TCC->S	non-synonymous	50S ribosomal protein L15
193	BruAb1_1219	N	1209774	1209304	63	1209712	G	A	CGC->R	CGT->R	synonymous	50S ribosomal protein L15
194	BruAb1_1240	N	1220080	1218905	1158	1218923	A	G	GTT->V	GTC->V	synonymous	elongation factor Tu
195	BruAb1_1240	N	1220080	1218905	489	1219592	G	A	ATC->I	ATT->I	synonymous	elongation factor Tu
196	BruAb1_1248	N	1232561	1228428	2148	1230414	T	C	CCA->P	CCG->P	synonymous	DNA-directed RNA polymerase subunit beta
197	BruAb1_1248	N	1232561	1228428	1020	1231542	C	T	GAG->E	GAA->E	synonymous	DNA-directed RNA polymerase subunit beta
198	BruAb1_1250	N	1233713	1233195	324	1233390	G	A	GGC->G	GGT->G	synonymous	50S ribosomal protein L10
199	BruAb1_1250	N	1233713	1233195	212	1233502	A	G	GTT->V	GCT->A	non-synonymous	50S ribosomal protein L10
200	BruAb1_1322	N	1301676	1299100	1665	1300012	G	A	GGC->G	GGT->G	synonymous	hypothetical protein
201	BruAb1_1322	N	1301676	1299100	1612	1300065	A	G	TTT->F	CTT->L	non-synonymous	hypothetical protein
202	BruAb1_1328	N	1309595	1308765	434	1309162	T	G	AAG->K	ACG->T	non-synonymous	CysW-2, sulfate ABC transporter permease
203	BruAb1_1328	N	1309595	1308765	433	1309163	T	G	AAG->K	CAG->Q	non-synonymous	CysW-2, sulfate ABC transporter permease
204	BruAb1_1345	Y	1326877	1325015	990	1325888	G	T	AGC->S	AGA->R	non-synonymous	iron compound TonB-dependent receptor
205	BruAb1_1345	N	1326877	1325015	753	1326125	G	A	GAC->D	GAT->D	synonymous	iron compound TonB-dependent receptor
206	BruAb1_1349	N	1332318	1331251	463	1331856	C	T	GAT->D	AAT->N	non-synonymous	HlyD family secretion protein
207	BruAb1_1349	N	1332318	1331251	27	1332292	A	G	ATT->I	ATC->I	synonymous	HlyD family secretion protein
208	BruAb1_1351	N	1334159	1332864	1280	1332880	G	T	GCT->A	GAT->D	non-synonymous	hypothetical protein
209	BruAb1_1351	N	1334159	1332864	1222	1332938	T	G	ATG->M	CTG->L	non-synonymous	hypothetical protein
210	BruAb1_1355	N	1335844	1337565	1110	1336953	G	A	ATG->M	ATA->I	non-synonymous	urease subunit alpha
211	BruAb1_1355	N	1335844	1337565	1328	1337171	C	T	CCG->P	CTG->L	non-synonymous	urease subunit alpha
212	BruAb1_1368	N	1346590	1347615	666	1347255	T	C	ATT->I	ATC->I	synonymous	hypothetical protein
213	BruAb1_1368	N	1346590	1347615	876	1347465	T	C	AAT->N	AAC->N	synonymous	hypothetical protein
214	BruAb1_1408	N	1383743	1386319	1021	1384763	T	G	TTG->L	GTG->V	non-synonymous	DNA helicase II
215	BruAb1_1408	N	1383743	1386319	1887	1385629	A	G	ATA->I	ATG->M	non-synonymous	DNA helicase II
216	BruAb1_1434	N	1417399	1416359	883	1416517	C	G	GCT->A	CCT->P	non-synonymous	S-adenosyl-methyltransferase MraW
217	BruAb1_1434	N	1417399	1416359	590	1416810	G	A	GCT->A	GTT->V	non-synonymous	S-adenosyl-methyltransferase MraW
218	BruAb1_1434	N	1417399	1416359	88	1417312	A	G	TTG->L	CTG->L	synonymous	S-adenosyl-methyltransferase MraW
219	BruAb1_1441	N	1422920	1422516	141	1422780	C	T	GCG->A	GCA->A	synonymous	hypothetical protein
220	BruAb1_1441	N	1422920	1422516	31	1422890	G	A	CTT->L	TTT->F	non-synonymous	hypothetical protein
221	BruAb1_1442	N	1423224	1424057	511	1423734	C	A	CTG->L	ATG->M	non-synonymous	glycosyl hydrolase family protein
222	BruAb1_1442	N	1423224	1424057	698	1423921	A	G	GAG->E	GGG->G	non-synonymous	glycosyl hydrolase family protein
223	BruAb1_1479	N	1459917	1458991	673	1459245	A	G	TTT->F	CTT->L	non-synonymous	hypothetical protein
224	BruAb1_1479	N	1459917	1458991	126	1459792	G	T	CGC->R	CGA->R	synonymous	hypothetical protein
225	BruAb1_1530	N	1509028	1508141	627	1508402	T	C	ACA->T	ACG->T	synonymous	ubiquinol-cytochrome c reductase, cytochrome c1
226	BruAb1_1530	N	1509028	1508141	356	1508673	A	G	GTG->V	GCG->A	non-synonymous	ubiquinol-cytochrome c reductase, cytochrome c1
227	BruAb1_1536	N	1515789	1516826	269	1516057	T	C	GTC->V	GCC->A	non-synonymous	purine nucleoside permease
228	BruAb1_1536	N	1515789	1516826	923	1516711	C	A	TCG->S	TAG->*	non-synonymous	purine nucleoside permease
229	BruAb1_1545	N	1522637	1523644	59	1522695	G	A	GGA->G	GAA->E	non-synonymous	MoxR protein
230	BruAb1_1545	N	1522637	1523644	69	1522705	T	C	CTT->L	CTC->L	synonymous	MoxR protein
231	BruAb1_1545	N	1522637	1523644	459	1523095	C	A	GGC->G	GGA->G	synonymous	MoxR protein
232	BruAb1_1593	N	1567998	1571105	862	1568859	A	G	AAT->N	GAT->D	non-synonymous	sensory box histidine kinase
233	BruAb1_1593	Y	1567998	1571105	2287	1570284	C	T	CGC->R	TGC->C	non-synonymous	sensory box histidine kinase
234	BruAb1_1665	N	1639622	1641052	487	1640108	T	G	TCC->S	GCC->A	non-synonymous	major facilitator family transporter
235	BruAb1_1665	N	1639622	1641052	786	1640407	G	A	AAG->K	AAA->K	synonymous	major facilitator family transporter
236	BruAb1_1665	N	1639622	1641052	1362	1640983	C	A	AGC->S	AGA->R	non-synonymous	major facilitator family transporter
237	BruAb1_1665	N	1639622	1641052	1426	1641047	G	C	GAG->E	CAG->Q	non-synonymous	major facilitator family transporter
238	BruAb1_1716	Y	1687715	1689625	254	1687968	G	A	CGC->R	CAC->H	non-synonymous	propionate--CoA ligase
239	BruAb1_1716	N	1687715	1689625	373	1688087	G	C	GTG->V	CTG->L	non-synonymous	propionate--CoA ligase
240	BruAb1_1716	N	1687715	1689625	1285	1688999	T	G	TTG->L	GTG->V	non-synonymous	propionate--CoA ligase
241	BruAb1_1762	N	1724852	1725643	173	1725024	C	A	GCG->A	GAG->E	non-synonymous	D-beta-hydroxybutyrate dehydrogenase
242	BruAb1_1762	Y	1724852	1725643	352	1725203	C	A	CTG->L	ATG->M	non-synonymous	D-beta-hydroxybutyrate dehydrogenase
243	BruAb1_1764	N	1730390	1726914	1749	1728642	T	C	CTA->L	CTG->L	synonymous	pyruvate carboxylase
244	BruAb1_1764	Y	1730390	1726914	1047	1729344	G	A	CGC->R	CGT->R	synonymous	pyruvate carboxylase
245	BruAb1_1772	Y	1738388	1737480	683	1737706	T	C	GAC->D	GGC->G	non-synonymous	branched-chain amino acid ABC transporter permease
246	BruAb1_1772	N	1738388	1737480	289	1738100	G	A	CGT->R	TGT->C	non-synonymous	branched-chain amino acid ABC transporter permease
247	BruAb1_1785	N	1751111	1751764	31	1751141	A	G	AAG->K	GAG->E	non-synonymous	translaldolase
248	BruAb1_1785	N	1751111	1751764	560	1751670	C	A	GCA->A	GAA->E	non-synonymous	translaldolase
249	BruAb1_1844	N	1820464	1819706	602	1819863	T	G	GAT->D	GCT->A	non-synonymous	hypothetical protein
250	BruAb1_1844	N	1820464	1819706	72	1820393	C	T	GAG->E	GAA->E	synonymous	hypothetical protein
251	BruAb1_1849	N	1825339	1823069	963	1824377	G	A	CGC->R	CGT->R	synonymous	phosphoenolpyruvate-protein phosphotransferase
252	BruAb1_1849	N	1825339	1823069	243	1825097	A	C	GTT->V	GTG->V	synonymous	phosphoenolpyruvate-protein phosphotransferase
253	BruAb1_1857	N	1831444	1832337	79	1831522	C	G	CCA->P	GCA->A	non-synonymous	hypothetical protein
254	BruAb1_1857	N	1831444	1832337	692	1832135	G	A	AGG->R	AAG->K	non-synonymous	hypothetical protein
255	BruAb1_1862	N	1837595	1836219	1188	1836408	T	G	ATA->I	ATC->I	synonymous	hypothetical protein
256	BruAb1_1862	N	1837595	1836219	509	1837087	T	C	GAA->E	GGA->G	non-synonymous	hypothetical protein
257	BruAb1_1862	N	1837595	1836219	80	1837516	C	T	AGA->R	AAA->K	non-synonymous	hypothetical protein
258	BruAb1_1878	N	1855617	1853776	1807	1853811	C	G	GTC->V	CTC->L	non-synonymous	succinate dehydrogenase flavoprotein subunit
259	BruAb1_1878	N	1855617	1853776	996	1854622	G	A	CTC->L	CTT->L	synonymous	succinate dehydrogenase flavoprotein subunit
260	BruAb1_1896	N	1870212	1869574	575	1869638	T	C	GAC->D	GGC->G	non-synonymous	amino acid transporter LysE
261	BruAb1_1896	N	1870212	1869574	36	1870177	C	T	ATG->M	ATA->I	non-synonymous	amino acid transporter LysE
262	BruAb1_1933	N	1903392	1904405	97	1903488	A	G	ACC->T	GCC->A	non-synonymous	arginase
263	BruAb1_1933	N	1903392	1904405	247	1903638	A	G	AAT->N	GAT->D	non-synonymous	arginase
264	BruAb1_1933	N	1903392	1904405	551	1903942	A	T	AAC->N	ATC->I	non-synonymous	arginase
265	BruAb1_1950	N	1919723	1920478	325	1920047	G	T	GCC->A	TCC->S	non-synonymous	radical activating protein
266	BruAb1_1950	N	1919723	1920478	326	1920048	C	T	GCC->A	GTC->V	non-synonymous	radical activating protein
267	BruAb1_1960	N	1927663	1930323	786	1928448	T	C	CTT->L	CTC->L	synonymous	hypothetical protein
268	BruAb1_1960	N	1927663	1930323	1152	1928814	A	G	AGA->R	AGG->R	synonymous	hypothetical protein
269	BruAb1_1965	N	1935036	1934017	606	1934431	G	A	AAC->N	AAT->N	synonymous	hypothetical protein
270	BruAb1_1965	N	1935036	1934017	465	1934572	C	T	GTG->V	GTA->V	synonymous	hypothetical protein
271	BruAb1_1972	N	1940798	1940139	480	1940319	T	A	CTA->L	CTT->L	synonymous	cell division ABC transporter ATP-binding protein FtsE
272	BruAb1_1972	N	1940798	1940139	315	1940484	T	A	CGA->R	CGT->R	synonymous	cell division ABC transporter ATP-binding protein FtsE
273	BruAb1_1976	N	1941857	1942543	205	1942061	G	T	GGC->G	TGC->C	non-synonymous	aquaporin Z
274	BruAb1_1976	N	1941857	1942543	590	1942446	G	C	AGG->R	ACG->T	non-synonymous	aquaporin Z
275	BruAb1_1987	N	1951809	1950253	138	1951672	G	A	GAC->D	GAT->D	synonymous	hypothetical protein
276	BruAb1_1987	N	1951809	1950253	122	1951688	T	G	CAG->Q	CCG->P	non-synonymous	hypothetical protein
277	BruAb1_2003	N	1971519	1970383	847	1970673	T	C	ATG->M	GTG->V	non-synonymous	3-dehydroquinate synthase
278	BruAb1_2003	N	1971519	1970383	19	1971501	A	C	TTT->F	GTT->V	non-synonymous	3-dehydroquinate synthase
279	BruAb1_2012	N	1978834	1979997	364	1979197	G	A	GCC->A	ACC->T	non-synonymous	M20/M25/M40 family peptidase
280	BruAb1_2012	Y	1978834	1979997	407	1979240	C	G	GCC->A	GGC->G	non-synonymous	M20/M25/M40 family peptidase
281	BruAb1_2017	N	1983700	1982066	1622	1982079	A	C	CTC->L	CGC->R	non-synonymous	L-sorbose dehydrogenase
282	BruAb1_2017	N	1983700	1982066	1490	1982211	A	G	GTC->V	GCC->A	non-synonymous	L-sorbose dehydrogenase
283	BruAb1_2035	N	2001651	2001010	557	2001095	C	A	AGT->S	ATT->I	non-synonymous	16S rRNA methyltransferase GidB
284	BruAb1_2035	Y	2001651	2001010	545	2001107	C	T	CGT->R	CAT->H	non-synonymous	16S rRNA methyltransferase GidB
285	BruAb1_2044	N	2012399	2013268	480	2012878	A	G	ACA->T	ACG->T	synonymous	shikimate 5-dehydrogenase
286	BruAb1_2044	N	2012399	2013268	535	2012933	A	G	AGC->S	GGC->G	non-synonymous	shikimate 5-dehydrogenase
287	BruAb1_2057	N	2022971	2023480	46	2023016	T	C	TCA->S	CCA->P	non-synonymous	hypothetical protein
288	BruAb1_2057	N	2022971	2023480	258	2023228	C	T	GTC->V	GTT->V	synonymous	hypothetical protein
289	BruAb1_2149	N	2116326	2115781	56	2116271	T	G	GAC->D	GCC->A	non-synonymous	hypothetical protein
290	BruAb1_2149	N	2116326	2115781	24	2116303	C	T	CTG->L	CTA->L	synonymous	hypothetical protein
291	BruAb2_0005	N	2092	3033	371	2462	C	T	TCG->S	TTG->L	non-synonymous	ribokinase
292	BruAb2_0005	N	2092	3033	759	2850	A	G	GTA->V	GTG->V	synonymous	ribokinase
293	BruAb2_0054	N	46579	51330	2442	49020	T	C	GGT->G	GGC->G	synonymous	glutamate synthase large subunit
294	BruAb2_0054	N	46579	51330	3806	50384	A	C	GAG->E	GCG->A	non-synonymous	glutamate synthase large subunit
295	BruAb2_0057	N	55683	54532	1084	54600	C	A	GCC->A	TCC->S	non-synonymous	hypothetical protein
296	BruAb2_0057	N	55683	54532	236	55448	T	C	CAC->H	CGC->R	non-synonymous	hypothetical protein
297	BruAb2_0098	N	96700	95495	826	95875	G	C	CGT->R	GGT->G	non-synonymous	amidase
298	BruAb2_0098	N	96700	95495	758	95943	G	A	ACA->T	ATA->I	non-synonymous	amidase
299	BruAb2_0151	N	143850	144332	228	144077	G	A	GTG->V	GTA->V	synonymous	flagellar basal body P-ring biosynthesis protein FlgA
300	BruAb2_0151	Y	143850	144332	336	144185	C	T	ACC->T	ACT->T	synonymous	flagellar basal body P-ring biosynthesis protein FlgA
301	BruAb2_0157	N	148320	148814	326	148645	G	T	GGC->G	GTC->V	non-synonymous	hypothetical protein
302	BruAb2_0157	N	148320	148814	327	148646	C	T	GGC->G	GGT->G	synonymous	hypothetical protein
303	BruAb2_0168	N	155799	161750	94	155892	A	C	ATC->I	CTC->L	non-synonymous	outermembrane transporter
304	BruAb2_0168	N	155799	161750	4396	160194	A	G	AGT->S	GGT->G	non-synonymous	outermembrane transporter
305	BruAb2_0168	N	155799	161750	5333	161131	A	G	CAG->Q	CGG->R	non-synonymous	outermembrane transporter
306	BruAb2_0179	Y	172342	171659	499	171844	T	C	ATT->I	GTT->V	non-synonymous	hypothetical protein
307	BruAb2_0179	N	172342	171659	85	172258	T	C	AAC->N	GAC->D	non-synonymous	hypothetical protein
308	BruAb2_0182	N	174085	175593	1028	175112	G	A	CGC->R	CAC->H	non-synonymous	histidyl-tRNA synthetase
309	BruAb2_0182	N	174085	175593	1403	175487	T	G	CTG->L	CGG->R	non-synonymous	histidyl-tRNA synthetase
310	BruAb2_0199	N	190976	191536	455	191430	C	T	GCG->A	GTG->V	non-synonymous	cytochrome b561
311	BruAb2_0199	N	190976	191536	499	191474	T	C	TAT->Y	CAT->H	non-synonymous	cytochrome b561
312	BruAb2_0203	N	194672	196123	65	194736	C	A	CCG->P	CAG->Q	non-synonymous	protease
313	BruAb2_0203	N	194672	196123	309	194980	T	C	ATT->I	ATC->I	synonymous	protease
314	BruAb2_0207	N	200437	201780	1133	201569	G	A	GGC->G	GAC->D	non-synonymous	hypothetical protein
315	BruAb2_0207	N	200437	201780	1143	201579	A	G	ATA->I	ATG->M	non-synonymous	hypothetical protein
316	BruAb2_0207	N	200437	201780	1202	201638	C	T	GCT->A	GTT->V	non-synonymous	hypothetical protein
317	BruAb2_0256	N	252009	253226	444	252452	C	A	GAC->D	GAA->E	non-synonymous	hypothetical protein
318	BruAb2_0256	N	252009	253226	1104	253112	A	G	CCA->P	CCG->P	synonymous	hypothetical protein
319	BruAb2_0273	N	267624	266788	787	266838	T	C	ACC->T	GCC->A	non-synonymous	YaeC family lipoprotein
320	BruAb2_0273	N	267624	266788	724	266901	C	T	GAT->D	AAT->N	non-synonymous	YaeC family lipoprotein
321	BruAb2_0273	N	267624	266788	247	267378	T	C	ACC->T	GCC->A	non-synonymous	YaeC family lipoprotein
322	BruAb2_0374	Y	373749	374597	465	374213	G	T	CTG->L	CTT->L	synonymous	DeoR family transcriptional regulator
323	BruAb2_0374	N	373749	374597	628	374376	G	A	GCC->A	ACC->T	non-synonymous	DeoR family transcriptional regulator
324	BruAb2_0377	N	376661	377995	241	376901	A	G	ACG->T	GCG->A	non-synonymous	FAD-binding oxidoreductase
325	BruAb2_0377	N	376661	377995	396	377056	C	G	CAC->H	CAG->Q	non-synonymous	FAD-binding oxidoreductase
326	BruAb2_0377	N	376661	377995	397	377057	G	T	GTG->V	TTG->L	non-synonymous	FAD-binding oxidoreductase
327	BruAb2_0389	N	391580	388611	702	390879	C	T	GCG->A	GCA->A	synonymous	HsdR restriction-modification enzyme, R subunit
328	BruAb2_0389	N	391580	388611	337	391244	T	C	ATG->M	GTG->V	non-synonymous	HsdR restriction-modification enzyme, R subunit
329	BruAb2_0390	N	392800	391577	535	392266	C	T	GCG->A	ACG->T	non-synonymous	HsdS restriction-modification system, S subunit
330	BruAb2_0390	N	392800	391577	266	392535	A	G	GTG->V	GCG->A	non-synonymous	HsdS restriction-modification system, S subunit
331	BruAb2_0440	N	442572	443228	273	442844	G	A	CCG->P	CCA->P	synonymous	S24 family peptidase
332	BruAb2_0440	N	442572	443228	499	443070	G	T	GTG->V	TTG->L	non-synonymous	S24 family peptidase
333	BruAb2_0469	N	473625	472252	1231	472395	T	C	AAC->N	GAC->D	non-synonymous	glutamate--cysteine ligase
334	BruAb2_0469	N	473625	472252	663	472963	C	A	CCG->P	CCT->P	synonymous	glutamate--cysteine ligase
335	BruAb2_0472	N	475211	477298	1110	476320	C	A	GGC->G	GGA->G	synonymous	hypothetical protein
336	BruAb2_0472	N	475211	477298	1181	476391	C	G	GCC->A	GGC->G	non-synonymous	hypothetical protein
337	BruAb2_0480	N	483724	482273	306	483419	C	A	CTG->L	CTT->L	synonymous	hypothetical protein
338	BruAb2_0480	N	483724	482273	235	483490	T	C	ACT->T	GCT->A	non-synonymous	hypothetical protein
339	BruAb2_0511	N	515013	517238	1413	516425	C	T	ACC->T	ACT->T	synonymous	ABC transporter permease
340	BruAb2_0511	N	515013	517238	1895	516907	G	A	AGT->S	AAT->N	non-synonymous	ABC transporter permease
341	BruAb2_0544	N	552562	551066	1080	551483	C	T	TTG->L	TTA->L	synonymous	Ppx/GppA phosphatase
342	BruAb2_0544	N	552562	551066	353	552210	A	C	GTC->V	GGC->G	non-synonymous	Ppx/GppA phosphatase
343	BruAb2_0549	N	559231	559830	180	559410	T	C	CTT->L	CTC->L	synonymous	hypothetical protein
344	BruAb2_0549	N	559231	559830	320	559550	C	T	GCG->A	GTG->V	non-synonymous	hypothetical protein
345	BruAb2_0549	N	559231	559830	471	559701	C	T	CGC->R	CGT->R	synonymous	hypothetical protein
346	BruAb2_0567	N	576168	574402	1585	574584	T	C	ATG->M	GTG->V	non-synonymous	TrkA family protein
347	BruAb2_0567	N	576168	574402	868	575301	A	G	TTT->F	CTT->L	non-synonymous	TrkA family protein
348	BruAb2_0604	N	610365	610742	225	610589	C	T	ATC->I	ATT->I	synonymous	endonuclease V
349	BruAb2_0604	N	610365	610742	228	610592	G	A	GCG->A	GCA->A	synonymous	endonuclease V
350	BruAb2_0620	N	627779	625146	2059	625721	T	C	ACC->T	GCC->A	non-synonymous	DNA topoisomerase I
351	BruAb2_0620	N	627779	625146	1800	625980	T	G	AGA->R	AGC->S	non-synonymous	DNA topoisomerase I
352	BruAb2_0630	N	635860	637341	290	636149	A	T	GAC->D	GTC->V	non-synonymous	aspartyl/glutamyl-tRNA amidotransferase subunit A
353	BruAb2_0630	N	635860	637341	783	636642	G	A	GTG->V	GTA->V	synonymous	aspartyl/glutamyl-tRNA amidotransferase subunit A
354	BruAb2_0651	N	665533	664175	939	664595	A	G	CTT->L	CTC->L	synonymous	2-octaprenyl-6-methoxyphenyl hydroxylase
355	BruAb2_0651	N	665533	664175	768	664766	C	A	CCG->P	CCT->P	synonymous	2-octaprenyl-6-methoxyphenyl hydroxylase
356	BruAb2_0703	N	716770	715700	608	716163	T	C	CAG->Q	CGG->R	non-synonymous	Gfo/Idh/MocA family oxidoreductase
357	BruAb2_0703	N	716770	715700	270	716501	A	C	CAT->H	CAG->Q	non-synonymous	Gfo/Idh/MocA family oxidoreductase
358	BruAb2_0767	Y	770535	771476	265	770799	T	C	TTC->F	CTC->L	non-synonymous	hypothetical protein
359	BruAb2_0767	N	770535	771476	501	771035	C	A	AGC->S	AGA->R	non-synonymous	hypothetical protein
360	BruAb2_0774	N	777866	779065	348	778213	T	C	GGT->G	GGC->G	synonymous	acetyl-CoA acetyltransferase
361	BruAb2_0774	N	777866	779065	1014	778879	A	C	GAA->E	GAC->D	non-synonymous	acetyl-CoA acetyltransferase
362	BruAb2_0785	Y	790644	788455	603	790042	A	G	CGT->R	CGC->R	synonymous	exopolysaccharide biosynthesis protein Bme12
363	BruAb2_0785	N	790644	788455	37	790608	G	A	CAG->Q	TAG->*	non-synonymous	exopolysaccharide biosynthesis protein Bme12
364	BruAb2_0801	N	807630	806467	901	806730	A	G	TAT->Y	CAT->H	non-synonymous	branched chain amino-acid ABC transporter substrate-binding protein
365	BruAb2_0801	N	807630	806467	5	807626	T	A	CAG->Q	CTG->L	non-synonymous	branched chain amino-acid ABC transporter substrate-binding protein
366	BruAb2_0807	N	814959	813130	794	814166	T	A	AAT->N	ATT->I	non-synonymous	branched-chain amino acid ABC transporter ATP-binding protein
367	BruAb2_0807	N	814959	813130	569	814391	G	A	GCT->A	GTT->V	non-synonymous	branched-chain amino acid ABC transporter ATP-binding protein
368	BruAb2_0807	N	814959	813130	307	814653	T	C	ACG->T	GCG->A	non-synonymous	branched-chain amino acid ABC transporter ATP-binding protein
369	BruAb2_0807	Y	814959	813130	213	814747	C	A	TCG->S	TCT->S	synonymous	branched-chain amino acid ABC transporter ATP-binding protein
370	BruAb2_0816	N	822055	824433	928	822982	G	C	GAG->E	CAG->Q	non-synonymous	phosphoketolase
371	BruAb2_0816	N	822055	824433	2269	824323	C	A	CCC->P	ACC->T	non-synonymous	phosphoketolase
372	BruAb2_0817	N	826064	824691	966	825099	C	T	CCG->P	CCA->P	synonymous	hypothetical protein
373	BruAb2_0817	N	826064	824691	225	825840	T	C	CTA->L	CTG->L	synonymous	hypothetical protein
374	BruAb2_0841	N	850513	849560	710	849804	A	G	GTC->V	GCC->A	non-synonymous	glutaminase
375	BruAb2_0841	N	850513	849560	407	850107	C	A	CGC->R	CTC->L	non-synonymous	glutaminase
376	BruAb2_0853	N	863561	862323	632	862930	G	A	GCT->A	GTT->V	non-synonymous	spermidine/putrescine ABC transporter permease
377	BruAb2_0853	N	863561	862323	282	863280	C	T	GCG->A	GCA->A	synonymous	spermidine/putrescine ABC transporter permease
378	BruAb2_0882	N	888087	891821	400	888486	G	A	GCC->A	ACC->T	non-synonymous	respiratory nitrate reductase subunit alpha NarG
379	BruAb2_0882	N	888087	891821	523	888609	A	G	ACC->T	GCC->A	non-synonymous	respiratory nitrate reductase subunit alpha NarG
380	BruAb2_0882	N	888087	891821	765	888851	A	C	TCA->S	TCC->S	synonymous	respiratory nitrate reductase subunit alpha NarG
381	BruAb2_0882	N	888087	891821	1557	889643	G	T	CAG->Q	CAT->H	non-synonymous	respiratory nitrate reductase subunit alpha NarG
382	BruAb2_0886	N	894835	895770	256	895090	G	A	GCC->A	ACC->T	non-synonymous	peptidyl-prolyl cis-trans isomerase
383	BruAb2_0886	Y	894835	895770	504	895338	G	A	CCG->P	CCA->P	synonymous	peptidyl-prolyl cis-trans isomerase
384	BruAb2_0902	N	909196	908366	102	909095	G	T	AGC->S	AGA->R	non-synonymous	nitrous-oxide reductase NosY
385	BruAb2_0902	N	909196	908366	101	909096	C	G	AGC->S	ACC->T	non-synonymous	nitrous-oxide reductase NosY
386	BruAb2_0902	N	909196	908366	100	909097	T	C	AGC->S	GGC->G	non-synonymous	nitrous-oxide reductase NosY
387	BruAb2_0902	N	909196	908366	99	909098	G	C	CTC->L	CTG->L	synonymous	nitrous-oxide reductase NosY
388	BruAb2_0903	N	910143	909193	800	909344	A	G	GTC->V	GCC->A	non-synonymous	copper ABC transporter ATP-binding protein
389	BruAb2_0903	N	910143	909193	612	909532	G	A	GTC->V	GTT->V	synonymous	copper ABC transporter ATP-binding protein
390	BruAb2_0903	N	910143	909193	394	909750	C	G	GAT->D	CAT->H	non-synonymous	copper ABC transporter ATP-binding protein
391	BruAb2_0915	N	925772	924720	965	924808	T	A	GAA->E	GTA->V	non-synonymous	sugar ABC transporter periplasmic sugar-binding protein
392	BruAb2_0915	N	925772	924720	681	925092	G	A	AAC->N	AAT->N	synonymous	sugar ABC transporter periplasmic sugar-binding protein
393	BruAb2_0952	N	958110	956632	1362	956749	C	T	CCG->P	CCA->P	synonymous	ABC transporter substrate-binding protein
394	BruAb2_0952	N	958110	956632	184	957927	G	A	CGC->R	TGC->C	non-synonymous	ABC transporter substrate-binding protein
395	BruAb2_1021	N	1019573	1018560	931	1018643	C	T	GTG->V	ATG->M	non-synonymous	peptide ABC transporter permease
396	BruAb2_1021	Y	1019573	1018560	564	1019010	G	C	AGC->S	AGG->R	non-synonymous	peptide ABC transporter permease
397	BruAb2_1021	N	1019573	1018560	519	1019055	C	A	CGG->R	CGT->R	synonymous	peptide ABC transporter permease
398	BruAb2_1024	Y	1023604	1021985	1364	1022241	G	T	GCA->A	GAA->E	non-synonymous	ABC transporter substrate-binding protein
399	BruAb2_1024	N	1023604	1021985	834	1022771	C	T	AAG->K	AAA->K	synonymous	ABC transporter substrate-binding protein
400	BruAb2_1063	N	1072017	1072295	109	1072125	A	C	ATG->M	CTG->L	non-synonymous	hypothetical protein
401	BruAb2_1063	N	1072017	1072295	183	1072199	G	A	GGG->G	GGA->G	synonymous	hypothetical protein
402	BruAb2_1075	N	1081650	1080196	1402	1080249	A	G	TGG->W	CGG->R	non-synonymous	flagellar hook-associated protein FlgK
403	BruAb2_1075	N	1081650	1080196	969	1080682	T	C	TCA->S	TCG->S	synonymous	flagellar hook-associated protein FlgK
404	BruAb2_1085	N	1092695	1102963	552	1093246	A	C	ACA->T	ACC->T	synonymous	outer membrane autotransporter
405	BruAb2_1085	N	1092695	1102963	4728	1097422	C	A	ATC->I	ATA->I	synonymous	outer membrane autotransporter
406	BruAb2_1089	N	1107568	1108737	543	1108110	A	G	ATA->I	ATG->M	non-synonymous	D-xylose ABC transporter permease
407	BruAb2_1089	N	1107568	1108737	1006	1108573	G	A	GGA->G	AGA->R	non-synonymous	D-xylose ABC transporter permease
408	BruAb2_1111	N	1131995	1133707	452	1132446	A	G	AAC->N	AGC->S	non-synonymous	branched-chain amino acid ABC transporter ATP-binding/permease
409	BruAb2_1111	N	1131995	1133707	453	1132447	C	A	AAC->N	AAA->K	non-synonymous	branched-chain amino acid ABC transporter ATP-binding/permease
410	BruAb2_1111	N	1131995	1133707	1003	1132997	A	G	ACA->T	GCA->A	non-synonymous	branched-chain amino acid ABC transporter ATP-binding/permease
411	BruAb2_1119	N	1140546	1139368	1103	1139444	C	T	GGT->G	GAT->D	non-synonymous	sugar ABC transporter ATP-binding protein
412	BruAb2_1119	N	1140546	1139368	622	1139925	C	T	GTG->V	ATG->M	non-synonymous	sugar ABC transporter ATP-binding protein
413	BruAb2_1123	N	1145050	1144268	479	1144572	G	C	GCT->A	GGT->G	non-synonymous	aurine ABC transporter ATP-binding protein
414	BruAb2_1123	N	1145050	1144268	27	1145024	A	G	AAT->N	AAC->N	synonymous	aurine ABC transporter ATP-binding protein
415	BruAb2_1124	N	1145799	1145047	247	1145553	A	G	TGG->W	CGG->R	non-synonymous	taurine ABC transporter permease
416	BruAb2_1124	N	1145799	1145047	227	1145573	G	T	CCG->P	CAG->Q	non-synonymous	taurine ABC transporter permease
417	BruAb2_1131	N	1152841	1153788	697	1153537	T	G	TTA->L	GTA->V	non-synonymous	inner-membrane translocator
418	BruAb2_1131	N	1152841	1153788	910	1153750	C	A	CGC->R	AGC->S	non-synonymous	inner-membrane translocator
419	BruAb1_0002	N	2503	3696	454	2956	C	A	CAT->H	AAT->N	non-synonymous	DNA polymerase III subunit beta
420	BruAb1_0003	N	3878	5032	57	3934	T	C	CTT->L	CTC->L	synonymous	recombination protein F
421	BruAb1_0004	N	5070	5852	651	5720	C	A	GGC->G	GGA->G	synonymous	molybdopterin biosynthesis protein MoeB
422	BruAb1_0007	N	9610	8471	199	9412	T	C	AGC->S	GGC->G	non-synonymous	ABC transporter permease
423	BruAb1_0015	N	17243	17443	19	17261	C	T	CGC->R	TGC->C	non-synonymous	hypothetical protein
424	BruAb1_0016	N	18234	17440	410	17825	G	A	ACG->T	ATG->M	non-synonymous	enoyl-CoA hydratase
425	BruAb1_0017	N	19094	18231	363	18732	C	A	CGG->R	CGT->R	synonymous	hydroxymethylglutaryl-CoA lyase
426	BruAb1_0019	N	22727	21120	1077	21651	G	A	TTC->F	TTT->F	synonymous	carboxyl transferase family protein
427	BruAb1_0025	N	29246	30598	626	29871	A	G	GAC->D	GGC->G	non-synonymous	3-phosphoshikimate 1-carboxyvinyltransferase
428	BruAb1_0044	N	49389	50018	40	49428	A	G	AGA->R	GGA->G	non-synonymous	ubiquinol oxidase subunit III
429	BruAb1_0046	N	50658	50380	227	50432	A	G	CTG->L	CCG->P	non-synonymous	hypothetical protein
430	BruAb1_0056	N	62903	62508	345	62559	A	G	GAT->D	GAC->D	synonymous	glyoxalase family protein
431	BruAb1_0059	N	66364	66179	72	66293	C	T	AGG->R	AGA->R	synonymous	hypothetical protein
432	BruAb1_0060	Y	67232	66339	82	67151	G	T	CTT->L	ATT->I	non-synonymous	LysR family transcriptional regulator
433	BruAb1_0062	N	68395	69051	532	68926	C	A	CTC->L	ATC->I	non-synonymous	fructose transport system kinase
434	BruAb1_0070	N	77229	75772	507	76723	G	A	GAC->D	GAT->D	synonymous	hypothetical protein
435	BruAb1_0085	N	92304	94853	1115	93418	C	T	ACC->T	ATC->I	non-synonymous	ABC transporter permease
436	BruAb1_0090	N	101146	98459	1789	99358	C	T	GAC->D	AAC->N	non-synonymous	aconitate hydratase
437	BruAb1_0092	N	102137	102802	349	102485	C	T	CTC->L	TTC->F	non-synonymous	heme exporter protein CcmB
438	BruAb1_0095	N	103812	104423	308	104119	G	A	CGT->R	CAT->H	non-synonymous	thiol:disulfide interchange protein CycY
439	BruAb1_0096	N	106507	104672	1331	105177	G	A	TCC->S	TTC->F	non-synonymous	dihydroxy-acid dehydratase
440	BruAb1_0101	N	108805	109209	339	109143	T	C	TCT->S	TCC->S	synonymous	hypothetical protein
441	BruAb1_0112	N	128292	127366	499	127794	T	C	AAA->K	GAA->E	non-synonymous	CscK, fructokinase
442	BruAb1_0113	N	129189	128383	141	129049	G	T	TCC->S	TCA->S	synonymous	short chain dehydrogenase/reductase family oxidoreductase
443	BruAb1_0114	N	131601	129310	1539	130063	C	A	CTG->L	CTT->L	synonymous	1A family penicillin-binding protein
444	BruAb1_0117	N	134301	133684	459	133843	T	C	TCA->S	TCG->S	synonymous	3'-5' exonuclease
445	BruAb1_0122	N	143802	141370	2370	141433	C	A	GAG->E	GAT->D	non-synonymous	DNA gyrase subunit B
446	BruAb1_0126	N	146096	145629	98	145999	A	G	GTG->V	GCG->A	non-synonymous	acetyltransferase
447	BruAb1_0131	N	151587	151898	89	151675	T	C	ATG->M	ACG->T	non-synonymous	IS711, transposase orfA
448	BruAb1_0133	N	152514	152726	161	152674	T	G	GTT->V	GGT->G	non-synonymous	hypothetical protein
449	BruAb1_0134	N	152922	153485	282	153203	A	C	ACA->T	ACC->T	synonymous	DNA-binding response regulator
450	BruAb1_0135	N	153985	153491	266	153720	A	C	CTG->L	CGG->R	non-synonymous	hypothetical protein
451	BruAb1_0147	N	171081	169936	86	170996	T	C	CAC->H	CGC->R	non-synonymous	SAM dependent methyltransferase
452	BruAb1_0154	N	176104	177606	1317	177420	C	T	CGC->R	CGT->R	synonymous	RNA polymerase factor sigma-54
453	BruAb1_0164	N	182929	182741	82	182848	G	A	CGC->R	TGC->C	non-synonymous	hypothetical protein
454	BruAb1_0166	N	184671	184015	280	184392	T	C	ACC->T	GCC->A	non-synonymous	hypothetical protein
455	BruAb1_0167	N	185484	184804	289	185196	C	A	GCC->A	TCC->S	non-synonymous	heat shock protein GrpE
456	BruAb1_0172	N	188837	190051	654	189490	C	A	ATC->I	ATA->I	synonymous	coproporphyrinogen III oxidase
457	BruAb1_0173	N	190063	190974	852	190914	A	G	ACA->T	ACG->T	synonymous	tetrapyrrole methylase family protein
458	BruAb1_0188	N	205240	206142	46	205285	T	C	TAT->Y	CAT->H	non-synonymous	sulfate adenylyltransferase subunit 2
459	BruAb1_0189	N	206142	208076	786	206927	T	C	TCT->S	TCC->S	synonymous	bifunctional sulfate adenylyltransferase subunit 1/adenylylsulfate kinase
460	BruAb1_0193	N	210902	211033	121	211022	A	C	AGC->S	CGC->R	non-synonymous	hypothetical protein
461	BruAb1_0198	N	216972	218006	688	217659	C	T	CGC->R	TGC->C	non-synonymous	alcohol dehydrogenase
462	BruAb1_0200	N	218491	219513	437	218927	T	C	ATG->M	ACG->T	non-synonymous	LacI family transcriptional regulator
463	BruAb1_0206	N	224279	223503	21	224259	A	G	AAT->N	AAC->N	synonymous	ABC transporter permease
464	BruAb1_0207	N	224974	224276	375	224600	C	T	GTG->V	GTA->V	synonymous	transcriptional regulator TenA
465	BruAb1_0209	N	226574	225963	358	226217	A	G	TTC->F	CTC->L	non-synonymous	thiamine-phosphate pyrophosphorylase
466	BruAb1_0214	N	229845	231956	1822	231666	C	T	CCC->P	TCC->S	non-synonymous	sensory box protein
467	BruAb1_0219	N	237707	236547	615	237093	G	A	CGC->R	CGT->R	synonymous	ABC transporter permease
468	BruAb1_0239	N	256170	257015	455	256624	T	C	ATC->I	ACC->T	non-synonymous	fumarylacetoacetate hydrolase family protein
469	BruAb1_0241	N	259256	258705	327	258930	A	C	TTT->F	TTG->L	non-synonymous	hypothetical protein
470	BruAb1_0245	N	260459	261655	277	260735	G	T	GCT->A	TCT->S	non-synonymous	integrase prophage protein
471	BruAb1_0250	Y	262902	263783	639	263540	C	T	TCC->S	TCT->S	synonymous	hypothetical protein
472	BruAb1_0253	N	266048	267064	993	267040	G	T	AGG->R	AGT->S	non-synonymous	hypothetical protein
473	BruAb1_0258	N	272071	272550	199	272269	C	A	CGC->R	AGC->S	non-synonymous	hypothetical protein
474	BruAb1_0262	N	274069	273836	222	273848	C	T	CTG->L	CTA->L	synonymous	hypothetical protein
475	BruAb1_0275	N	281615	281400	46	281570	C	T	GCG->A	ACG->T	non-synonymous	zinc-binding protein
476	BruAb1_0279	N	283577	283095	315	283263	A	G	ATT->I	ATC->I	synonymous	hypothetical protein
477	BruAb1_0298	N	299985	300671	624	300608	C	G	ACC->T	ACG->T	synonymous	urease accessory protein UreF
478	BruAb1_0299	Y	300668	301294	562	301229	A	G	AAG->K	GAG->E	non-synonymous	urease accessory protein UreG
479	BruAb1_0300	N	303275	301650	1459	301817	T	C	AGC->S	GGC->G	non-synonymous	sensor histidine kinase
480	BruAb1_0303	N	304726	307857	2738	307463	G	C	AGC->S	ACC->T	non-synonymous	AcrB/AcrD/AcrF multidrug efflux protein
481	BruAb1_0309	Y	314898	313408	5	314894	C	T	CGA->R	CAA->Q	non-synonymous	oxidoreductase
482	BruAb1_0310	N	315529	315077	186	315344	C	A	ATG->M	ATT->I	non-synonymous	hypothetical protein
483	BruAb1_0313	N	318524	319270	268	318791	A	C	ACG->T	CCG->P	non-synonymous	HAD superfamily hydrolase
484	BruAb1_0314	N	320115	319243	670	319446	C	T	GCT->A	ACT->T	non-synonymous	hypothetical protein
485	BruAb1_0315	N	321805	320141	1186	320620	T	C	AAT->N	GAT->D	non-synonymous	long-chain-fatty-acid--CoA ligase
486	BruAb1_0316	N	322866	322237	291	322576	C	A	GAG->E	GAT->D	non-synonymous	TetR family transcriptional regulator
487	BruAb1_0321	N	328934	328092	794	328141	C	T	GGT->G	GAT->D	non-synonymous	amino acid ABC transporter substrate-binding protein
488	BruAb1_0330	N	338318	337926	95	338224	C	A	GGT->G	GTT->V	non-synonymous	ApaG protein
489	BruAb1_0331	N	339883	338687	1008	338876	G	A	ATC->I	ATT->I	synonymous	O-succinylhomoserine sulfhydrylase
490	BruAb1_0335	N	342961	343380	378	343338	C	T	AGC->S	AGT->S	synonymous	hypothetical protein
491	BruAb1_0338	N	346368	346015	74	346295	G	A	GCC->A	GTC->V	non-synonymous	hypothetical protein
492	BruAb1_0347	N	356407	355688	70	356338	C	T	GTC->V	ATC->I	non-synonymous	glycosyl transferase family protein
493	BruAb1_0350	N	358469	357579	675	357795	A	G	TTT->F	TTC->F	synonymous	LysR family transcriptional regulator
494	BruAb1_0351	N	358591	359010	312	358902	G	A	GGG->G	GGA->G	synonymous	hypothetical protein
495	BruAb1_0360	N	365041	366138	333	365373	A	G	GCA->A	GCG->A	synonymous	carboxynorspermidine decarboxylase
496	BruAb1_0368	N	372891	373532	434	373324	A	G	AAA->K	AGA->R	non-synonymous	LuxR family transcriptional regulator
497	BruAb1_0376	N	381451	383568	2	381452	T	C	ATG->M	ACG->T	non-synonymous	xanthine dehydrogenase
498	BruAb1_0380	N	387054	388358	345	387398	C	T	TTC->F	TTT->F	synonymous	guanine deaminase
499	BruAb1_0381	N	388438	389724	616	389053	G	C	GTG->V	CTG->L	non-synonymous	hydroxypyruvate reductase
500	BruAb1_0394	N	401127	402212	657	401783	C	T	AGC->S	AGT->S	synonymous	ada regulatory protein
501	BruAb1_0395	N	402394	402744	127	402520	C	A	CTC->L	ATC->I	non-synonymous	hypothetical protein
502	BruAb1_0398	N	405680	406927	996	406675	G	A	CAG->Q	CAA->Q	synonymous	transporter
503	BruAb1_0402	N	410513	411829	406	410918	C	T	CGC->R	TGC->C	non-synonymous	molecular chaperone DnaK
504	BruAb1_0411	Y	417448	416786	384	417065	C	A	CTG->L	CTT->L	synonymous	ribonuclease HII
505	BruAb1_0416	N	420494	420282	123	420372	C	A	AAG->K	AAT->N	non-synonymous	hypothetical protein
506	BruAb1_0427	N	430307	432640	672	430978	T	C	CGT->R	CGC->R	synonymous	glycyl-tRNA synthetase subunit beta
507	BruAb1_0429	N	433776	435188	228	434003	T	C	CTT->L	CTC->L	synonymous	FAD-binding oxidoreductase
508	BruAb1_0467	N	467826	467086	406	467421	C	T	GCC->A	ACC->T	non-synonymous	short chain dehydrogenase/reductase family oxidoreductase
509	BruAb1_0479	N	477969	478913	720	478688	T	C	ACT->T	ACC->T	synonymous	ACP S-malonyltransferase
510	BruAb1_0485	N	483464	484363	283	483746	C	T	CTG->L	TTG->L	synonymous	hypothetical protein
511	BruAb1_0488	N	487210	486614	387	486824	A	G	CTT->L	CTC->L	synonymous	hypothetical protein
512	BruAb1_0512	N	511781	510075	1682	510100	C	T	CGC->R	CAC->H	non-synonymous	voltage gated chloride channel family protein
513	BruAb1_0528	N	528422	529021	218	528639	G	A	CGC->R	CAC->H	non-synonymous	BioY family protein
514	BruAb1_0530	N	529678	530034	61	529738	C	T	CGC->R	TGC->C	non-synonymous	hypothetical protein
515	BruAb1_0533	N	534340	533333	86	534255	C	T	AGC->S	AAC->N	non-synonymous	glycosyl transferase family protein
516	BruAb1_0536	N	536121	536420	145	536265	C	A	CAA->Q	AAA->K	non-synonymous	transposase
517	BruAb1_0542	N	540624	539866	512	540113	G	T	GCC->A	GAC->D	non-synonymous	O-antigen export system ATP-binding protein RfbE
518	BruAb1_0545	N	543617	542529	339	543279	C	A	CTG->L	CTT->L	synonymous	Gmd, GDP-mannose 4,6-dehydratase
519	BruAb1_0552	N	546878	547996	1047	547924	A	C	AAA->K	AAC->N	non-synonymous	mannosyltransferase
520	BruAb1_0562	Y	554137	555309	408	554544	G	C	CCG->P	CCC->P	synonymous	mannose-6-phosphate isomerase
521	BruAb1_0566	N	559829	560791	741	560569	A	G	GTA->V	GTG->V	synonymous	ribose ABC transporter
522	BruAb1_0568	N	561909	563006	896	562804	A	C	CAG->Q	CCG->P	non-synonymous	oxidoreductase
523	BruAb1_0569	N	564355	563048	415	563941	C	T	GGC->G	AGC->S	non-synonymous	xylose isomerase
524	BruAb1_0579	N	574721	574332	213	574509	A	G	GGT->G	GGC->G	synonymous	death-on-curing family protein
525	BruAb1_0593	N	587493	587948	371	587863	G	A	CGT->R	CAT->H	non-synonymous	hypothetical protein
526	BruAb1_0599	Y	593256	594224	804	594059	C	T	GCC->A	GCT->A	synonymous	peptidoglycan-binding protein
527	BruAb1_0610	N	603511	604785	595	604105	T	G	TCG->S	GCG->A	non-synonymous	major capsid protein
528	BruAb1_0624	N	615223	616611	450	615672	A	G	GTA->V	GTG->V	synonymous	sensor histidine kinase
529	BruAb1_0633	N	625721	628336	867	626587	A	G	CAA->Q	CAG->Q	synonymous	bifunctional glutamine-synthetase adenylyltransferase/deadenyltransferase
530	BruAb1_0637	Y	636427	637341	730	637156	G	A	GCG->A	ACG->T	non-synonymous	hypothetical protein
531	BruAb1_0640	N	640025	641716	1077	641101	T	G	GCT->A	GCG->A	synonymous	electron transfer flavoprotein, oxidoreductase
532	BruAb1_0647	N	646435	646151	175	646261	G	T	CTG->L	ATG->M	non-synonymous	hypothetical protein
533	BruAb1_0651	N	648398	649048	567	648964	C	T	GCC->A	GCT->A	synonymous	hypothetical protein
534	BruAb1_0656	N	653907	653800	47	653861	G	A	ACT->T	ATT->I	non-synonymous	hypothetical protein
535	BruAb1_0657	N	653947	655074	768	654714	A	C	ATA->I	ATC->I	synonymous	Omp2b, porin
536	BruAb1_0671	N	666435	667181	367	666801	C	G	CCC->P	GCC->A	non-synonymous	Crp/Fnr family transcriptional regulator
537	BruAb1_0673	N	670291	669080	1152	669140	T	C	CTA->L	CTG->L	synonymous	fosmidomycin resistance protein Fsr
538	BruAb1_0686	N	680057	679293	482	679576	A	G	TTG->L	TCG->S	non-synonymous	hypothetical protein
539	BruAb1_0694	N	683480	685000	633	684112	C	T	GGC->G	GGT->G	synonymous	cysteinyl-tRNA synthetase
540	BruAb1_0700	N	688334	690067	1575	689908	T	C	ACT->T	ACC->T	synonymous	M24/M37 family peptidase
541	BruAb1_0701	N	690965	690135	752	690214	A	G	ATG->M	ACG->T	non-synonymous	dimethyladenosine transferase
542	BruAb1_0704	N	695720	693342	1237	694484	T	C	AGT->S	GGT->G	non-synonymous	organic solvent tolerance protein
543	BruAb1_0714	N	705099	704284	482	704618	T	C	GAC->D	GGC->G	non-synonymous	hypothetical protein
544	BruAb1_0716	N	706087	705830	93	705995	A	G	GTT->V	GTC->V	synonymous	MoaD, molybdopterin converting factor, subunit 1
545	BruAb1_0717	N	706676	706092	450	706227	A	G	CTT->L	CTC->L	synonymous	CDP-diacylglycerol--glycerol-3-phosphate 3-phosphatidyltransferase
546	BruAb1_0722	N	712105	711416	286	711820	G	A	CGC->R	TGC->C	non-synonymous	ribonuclease T2 family protein
547	BruAb1_0724	N	713543	712671	553	712991	T	C	AGC->S	GGC->G	non-synonymous	hypothetical protein
548	BruAb1_0729	N	719368	718289	618	718751	G	T	CGC->R	CGA->R	synonymous	phosphoribosylaminoimidazole synthetase
549	BruAb1_0742	N	731767	730232	935	730833	G	T	ACA->T	AAA->K	non-synonymous	acetyltransferase
550	BruAb1_0750	N	739623	740930	64	739686	A	C	AAA->K	CAA->Q	non-synonymous	hypothetical protein
551	BruAb1_0754	N	745030	744782	187	744844	C	T	GGC->G	AGC->S	non-synonymous	lipoprotein
552	BruAb1_0756	Y	746414	745275	508	745907	C	A	GCC->A	TCC->S	non-synonymous	cystathionine beta-lyase
553	BruAb1_0763	N	753632	752427	1145	752488	A	G	ATT->I	ACT->T	non-synonymous	salicylate hydroxylase
554	BruAb1_0764	N	753916	753662	121	753796	G	T	CTC->L	ATC->I	non-synonymous	hypothetical protein
555	BruAb1_0767	N	759288	758131	505	758784	G	T	CTT->L	ATT->I	non-synonymous	RND, ribonuclease D
556	BruAb1_0771	N	762939	765251	2165	765103	G	C	AGC->S	ACC->T	non-synonymous	DNA topoisomerase IV subunit A
557	BruAb1_0772	N	766179	765430	105	766075	C	A	GTG->V	GTT->V	synonymous	arginyl-tRNA-protein transferase
558	BruAb1_0778	N	770676	770536	70	770607	C	A	GGC->G	TGC->C	non-synonymous	hypothetical protein
559	BruAb1_0779	N	770811	772112	488	771298	G	C	GGT->G	GCT->A	non-synonymous	peptidoglycan-binding protein
560	BruAb1_0782	N	773901	774377	46	773946	T	A	TCC->S	ACC->T	non-synonymous	transcriptional regulator NrdR
561	BruAb1_0783	N	774379	775500	840	775218	A	C	ACA->T	ACC->T	synonymous	riboflavin biosynthesis protein RibD
562	BruAb1_0788	N	780382	779864	222	780161	G	T	GGC->G	GGA->G	synonymous	hypothetical protein
563	BruAb1_0795	N	785965	785648	236	785730	C	T	CGC->R	CAC->H	non-synonymous	SugE protein
564	BruAb1_0801	N	790214	791290	548	790761	T	C	GTC->V	GCC->A	non-synonymous	cytochrome c oxidase assembly protein
565	BruAb1_0804	N	793982	793506	349	793634	C	A	GAC->D	TAC->Y	non-synonymous	30S ribosomal protein S9
566	BruAb1_0809	Y	797353	797484	130	797482	T	G	TAA->*	GAA->E	non-synonymous	hypothetical protein
567	BruAb1_0810	N	797738	798247	26	797763	A	C	AAA->K	ACA->T	non-synonymous	hypothetical protein
568	BruAb1_0814	N	799783	799965	19	799801	A	G	ATG->M	GTG->V	non-synonymous	hypothetical protein
569	BruAb1_0819	N	802736	803926	1064	803799	T	G	TTC->F	TGC->C	non-synonymous	NADH dehydrogenase subunit D
570	BruAb1_0820	N	803926	804639	367	804292	A	G	AAC->N	GAC->D	non-synonymous	NADH dehydrogenase subunit E
571	BruAb1_0822	N	806085	808169	515	806599	C	G	TCG->S	TGG->W	non-synonymous	NADH dehydrogenase subunit G
572	BruAb1_0825	N	809910	810527	612	810521	C	T	GGC->G	GGT->G	synonymous	NADH dehydrogenase subunit J
573	BruAb1_0827	N	810854	812839	171	811024	C	A	GCC->A	GCA->A	synonymous	NADH dehydrogenase subunit L
574	BruAb1_0829	N	814369	815805	369	814737	T	G	TCT->S	TCG->S	synonymous	NADH dehydrogenase subunit N
575	BruAb1_0835	N	819743	819835	6	819748	G	T	GTG->V	GTT->V	synonymous	hypothetical protein
576	BruAb1_0836	N	820062	821390	1294	821355	A	G	AAA->K	GAA->E	non-synonymous	prolyl-tRNA synthetase
577	BruAb1_0837	N	821432	822700	261	821692	T	C	GAT->D	GAC->D	synonymous	ABC transporter permease
578	BruAb1_0846	Y	834129	832864	1251	832879	G	A	GCC->A	GCT->A	synonymous	Bcr/CflA subfamily drug resistance transporter
579	BruAb1_0855	N	841005	840241	382	840624	T	C	AAC->N	GAC->D	non-synonymous	phosphoribosylaminoimidazole-succinocarboxamide synthase
580	BruAb1_0860	N	843384	844175	192	843575	C	T	CGC->R	CGT->R	synonymous	glyoxalase family protein
581	BruAb1_0862	N	846406	845729	668	845739	C	T	CGT->R	CAT->H	non-synonymous	Rpe, ribulose-phosphate 3-epimerase
582	BruAb1_0867	N	851503	851222	48	851456	A	G	AGT->S	AGC->S	synonymous	acyl carrier protein
583	BruAb1_0869	N	852681	853703	486	853166	T	C	GAT->D	GAC->D	synonymous	aldose 1-epimerase
584	BruAb1_0875	N	858595	859617	843	859437	T	C	ATT->I	ATC->I	synonymous	tRNA-dihydrouridine synthase A
585	BruAb1_0879	N	861468	862487	699	862166	A	G	GCA->A	GCG->A	synonymous	nicotinate-nucleotide--dimethylbenzimidazole phosphoribosyltransferase
586	BruAb1_0885	N	866774	865992	309	866466	A	C	GTT->V	GTG->V	synonymous	exodeoxyribonuclease III
587	BruAb1_0887	N	868056	867730	27	868030	G	A	TCC->S	TCT->S	synonymous	HesB/YadR/YfhF family protein
588	BruAb1_0889	N	869654	871411	559	870212	C	T	CGT->R	TGT->C	non-synonymous	arginyl-tRNA synthetase
589	BruAb1_0897	N	879411	880694	769	880179	C	A	CTG->L	ATG->M	non-synonymous	seryl-tRNA synthetase
590	BruAb1_0898	N	880843	881610	146	880988	T	C	TTG->L	TCG->S	non-synonymous	stationary phase survival protein SurE
591	BruAb1_0916	N	898728	898114	396	898333	C	T	CTG->L	CTA->L	synonymous	leucyl/phenylalanyl-tRNA--protein transferase
592	BruAb1_0919	N	901087	900614	447	900641	T	G	AAA->K	AAC->N	non-synonymous	3-dehydroquinate dehydratase
593	BruAb1_0920	N	902128	901331	56	902073	T	A	CAT->H	CTT->L	non-synonymous	hypothetical protein
594	BruAb1_0922	N	903783	904946	429	904211	C	A	ACC->T	ACA->T	synonymous	class I aminotransferase
595	BruAb1_0934	N	917024	920422	3114	920137	A	G	TCA->S	TCG->S	synonymous	hypothetical protein
596	BruAb1_0942	N	928010	929287	208	928217	C	A	CAG->Q	AAG->K	non-synonymous	hypothetical protein
597	BruAb1_0943	N	929369	930613	1022	930390	C	T	GCA->A	GTA->V	non-synonymous	class V aminotransferase
598	BruAb1_0945	N	932034	931063	26	932009	C	G	GGG->G	GCG->A	non-synonymous	glycosyl transferase group 2 family protein
599	BruAb1_0947	N	933562	935010	1230	934791	T	G	AAT->N	AAG->K	non-synonymous	DEAD/DEAH box helicase
600	BruAb1_0957	N	940394	943126	19	940412	T	G	TAC->Y	GAC->D	non-synonymous	valyl-tRNA synthetase
601	BruAb1_0964	N	949250	948216	844	948407	G	A	CTT->L	TTT->F	non-synonymous	molybdenum cofactor biosynthesis protein A
602	BruAb1_0981	N	962759	962439	85	962675	T	A	ATC->I	TTC->F	non-synonymous	hypothetical protein
603	BruAb1_0997	N	974108	975298	451	974558	A	G	ACC->T	GCC->A	non-synonymous	D-alanyl-D-alanine carboxypeptidase
604	BruAb1_0998	N	975389	976024	612	976000	T	C	ATT->I	ATC->I	synonymous	thymidylate kinase
605	BruAb1_0999	N	976021	977103	1012	977032	T	G	TCG->S	GCG->A	non-synonymous	DNA polymerase III subunit delta'
606	BruAb1_1001	N	977272	978819	455	977726	A	C	CAG->Q	CCG->P	non-synonymous	methionyl-tRNA synthetase
607	BruAb1_1009	N	987529	986120	1267	986263	T	C	AAC->N	GAC->D	non-synonymous	glutamine synthetase
608	BruAb1_1014	N	990886	990999	51	990936	G	T	CTG->L	CTT->L	synonymous	hypothetical protein
609	BruAb1_1027	Y	1006836	1007438	283	1007118	T	G	TCG->S	GCG->A	non-synonymous	lipoprotein
610	BruAb1_1043	N	1022710	1021454	1099	1021612	C	A	GAG->E	TAG->*	non-synonymous	hypothetical protein
611	BruAb1_1047	N	1029566	1028340	1103	1028464	T	C	GAG->E	GGG->G	non-synonymous	hypothetical protein
612	BruAb1_1048	N	1033438	1029656	1203	1032236	G	A	AAC->N	AAT->N	synonymous	ribonucleotide-diphosphate reductase subunit alpha
613	BruAb1_1054	N	1037659	1038258	3	1037661	G	A	ATG->M	ATA->I	non-synonymous	TrpR binding protein WrbA
614	BruAb1_1059	N	1042683	1043426	564	1043246	C	T	GGC->G	GGT->G	synonymous	hypothetical protein
615	BruAb1_1077	Y	1061620	1060388	702	1060919	G	T	ACC->T	ACA->T	synonymous	D-alanyl-D-alanine carboxypeptidase
616	BruAb1_1079	N	1062540	1062100	399	1062142	A	T	GCT->A	GCA->A	synonymous	NifU-like protein
617	BruAb1_1085	N	1067369	1067641	123	1067491	A	C	AGA->R	AGC->S	non-synonymous	hypothetical protein
618	BruAb1_1092	Y	1076011	1076862	523	1076533	C	T	CCC->P	TCC->S	non-synonymous	LysR family transcriptional regulator
619	BruAb1_1096	N	1082364	1082930	163	1082526	A	C	ATT->I	CTT->L	non-synonymous	TetR family transcriptional regulator
620	BruAb1_1101	N	1086984	1086490	336	1086649	G	A	ACC->T	ACT->T	synonymous	phosphopantetheine adenylyltransferase
621	BruAb1_1106	N	1092036	1092797	103	1092138	C	A	CCC->P	ACC->T	non-synonymous	GntR family transcriptional regulator
622	BruAb1_1125	N	1115476	1114475	605	1114872	A	T	ATC->I	AAC->N	non-synonymous	NifR3, nitrogen regulation protein Nifr3
623	BruAb1_1126	N	1115614	1116843	384	1115997	G	T	TTG->L	TTT->F	non-synonymous	bifunctional 2-C-methyl-D-erythritol 4-phosphate cytidylyltransferase/2-C-methyl-D-erythritol 2,4-cyclodiphosphate synthase protein
624	BruAb1_1127	N	1116840	1117337	354	1117193	C	A	GGC->G	GGA->G	synonymous	CinA, competence/damage-inducible protein CinA
625	BruAb1_1134	N	1124328	1122943	912	1123417	A	G	TTT->F	TTC->F	synonymous	pyruvate dehydrogenase subunit beta
626	BruAb1_1137	N	1126708	1126127	22	1126687	A	T	TTT->F	ATT->I	non-synonymous	hypothetical protein
627	BruAb1_1139	N	1129342	1128509	706	1128637	A	G	TTC->F	CTC->L	non-synonymous	2-dehydro-3-deoxyphosphooctonate aldolase
628	BruAb1_1141	N	1131211	1131089	26	1131186	C	G	CGG->R	CCG->P	non-synonymous	hypothetical protein
629	BruAb1_1144	N	1133602	1132838	757	1132846	T	C	AAT->N	GAT->D	non-synonymous	triosephosphate isomerase
630	BruAb1_1145	N	1133821	1135707	1264	1135084	G	A	GAC->D	AAC->N	non-synonymous	rotamase family protein
631	BruAb1_1149	N	1138154	1139368	5	1138158	C	G	CCC->P	CGC->R	non-synonymous	MoeA, molybdopterin biosynthesis protein MoeA
632	BruAb1_1153	N	1143084	1144505	1133	1144216	G	A	AGC->S	AAC->N	non-synonymous	glutamyl-tRNA synthetase
633	BruAb1_1157	N	1149102	1148266	258	1148845	C	T	GTG->V	GTA->V	synonymous	UDP-N-acetylglucosamine acyltransferase
634	BruAb1_1160	N	1153031	1150686	984	1152048	G	A	AGC->S	AGT->S	synonymous	surface antigen
635	BruAb1_1163	N	1155385	1154573	447	1154939	A	C	GGT->G	GGG->G	synonymous	phosphatidate cytidylyltransferase
636	BruAb1_1178	N	1167840	1169258	1120	1168959	C	T	CCG->P	TCG->S	non-synonymous	D-alanyl-D-alanine carboxypeptidase
637	BruAb1_1187	N	1175152	1175499	145	1175296	A	T	ATT->I	TTT->F	non-synonymous	hypothetical protein
638	BruAb1_1195	N	1182924	1185062	1146	1184069	G	C	ACG->T	ACC->T	synonymous	methylmalonyl-CoA mutase
639	BruAb1_1197	N	1187766	1185718	2023	1185744	C	G	GTG->V	CTG->L	non-synonymous	hypothetical protein
640	BruAb1_1202	N	1190978	1191562	446	1191423	T	C	GTC->V	GCC->A	non-synonymous	ThiJ/PfpI family protein
641	BruAb1_1204	N	1192189	1193403	699	1192887	T	C	TTT->F	TTC->F	synonymous	isocitrate dehydrogenase
642	BruAb1_1209	N	1200350	1199688	90	1200261	A	G	TCT->S	TCC->S	synonymous	OmpA family protein
643	BruAb1_1218	N	1209143	1207803	618	1208526	A	G	GGT->G	GGC->G	synonymous	preprotein translocase subunit SecY
644	BruAb1_1235	N	1216861	1216028	339	1216523	G	A	GGC->G	GGT->G	synonymous	50S ribosomal protein L2
645	BruAb1_1243	N	1223167	1222796	330	1222838	T	G	CGA->R	CGC->R	synonymous	30S ribosomal protein S12
646	BruAb1_1255	Y	1238041	1236866	489	1237553	G	A	ATC->I	ATT->I	synonymous	elongation factor Tu
647	BruAb1_1260	N	1241017	1241112	25	1241041	G	A	GTT->V	ATT->I	non-synonymous	hypothetical protein
648	BruAb1_1270	N	1247784	1248224	169	1247952	C	A	CGC->R	AGC->S	non-synonymous	lactoylglutathione lyase
649	BruAb1_1273	N	1252359	1251298	477	1251883	G	A	CGC->R	CGT->R	synonymous	D-alanyl-alanine synthetase A
650	BruAb1_1281	N	1260079	1260171	71	1260149	C	A	GCA->A	GAA->E	non-synonymous	hypothetical protein
651	BruAb1_1286	N	1264862	1263657	752	1264111	C	T	CGC->R	CAC->H	non-synonymous	precorrin-6Y C5,15-methyltransferase
652	BruAb1_1287	N	1264939	1266231	617	1265555	T	C	CTG->L	CCG->P	non-synonymous	nitrite reductase family protein
653	BruAb1_1288	N	1266241	1266867	295	1266535	A	G	AGC->S	GGC->G	non-synonymous	precorrin-8X methylmutase
654	BruAb1_1289	N	1266867	1267601	51	1266917	T	C	CCT->P	CCC->P	synonymous	precorrin-2 C(20)-methyltransferase
655	BruAb1_1296	N	1274597	1273599	792	1273806	A	C	GTT->V	GTG->V	synonymous	CobC protein
656	BruAb1_1298	N	1276749	1275901	82	1276668	C	A	GGT->G	TGT->C	non-synonymous	uroporphyrin-III C-methyltransferase
657	BruAb1_1299	N	1276840	1277946	570	1277409	G	A	GTG->V	GTA->V	synonymous	cobalt-precorrin-6A synthase
658	BruAb1_1300	N	1277933	1278679	643	1278575	A	G	ACC->T	GCC->A	non-synonymous	cobalt-precorrin-6x reductase
659	BruAb1_1303	N	1280320	1279874	43	1280278	C	T	GAG->E	AAG->K	non-synonymous	hypothetical protein
660	BruAb1_1304	Y	1280480	1281265	117	1280596	G	A	CTG->L	CTA->L	synonymous	hypothetical protein
661	BruAb1_1306	N	1282238	1281600	21	1282218	C	T	AAG->K	AAA->K	synonymous	cob(I)yrinic acid a,c-diamide adenosyltransferase
662	BruAb1_1307	N	1286022	1282231	446	1285577	A	G	ATG->M	ACG->T	non-synonymous	cobaltochelatase subunit CobN
663	BruAb1_1313	N	1290521	1290372	7	1290515	C	T	GGA->G	AGA->R	non-synonymous	hypothetical protein
664	BruAb1_1321	N	1298993	1298703	117	1298877	T	C	CCA->P	CCG->P	synonymous	hypothetical protein
665	BruAb1_1323	N	1302390	1301806	559	1301832	C	G	GGC->G	CGC->R	non-synonymous	hypothetical protein
666	BruAb1_1324	N	1302442	1304979	2220	1304661	C	A	GTC->V	GTA->V	synonymous	bifunctional preprotein translocase subunit SecD/SecF
667	BruAb1_1335	N	1316851	1316429	204	1316648	G	T	GAC->D	GAA->E	non-synonymous	fucose operon fucU protein FucU
668	BruAb1_1340	N	1320904	1319975	29	1320876	G	T	GCC->A	GAC->D	non-synonymous	sugar ABC transporter periplasmic sugar-binding protein
669	BruAb1_1344	N	1325001	1324162	692	1324310	A	G	GTG->V	GCG->A	non-synonymous	iron ABC transporter substrate-binding protein
670	BruAb1_1363	N	1342983	1343609	481	1343463	T	G	TTG->L	GTG->V	non-synonymous	hypothetical protein
671	BruAb1_1385	N	1362940	1361117	249	1362692	G	A	CGC->R	CGT->R	synonymous	acetolactate synthase 3 catalytic subunit
672	BruAb1_1387	N	1364324	1365037	364	1364687	C	T	CCG->P	TCG->S	non-synonymous	phosphoserine phosphatase
673	BruAb1_1389	N	1367963	1366389	957	1367007	A	G	AAT->N	AAC->N	synonymous	serine protease Do
674	BruAb1_1403	N	1380356	1376613	2175	1378182	G	A	GCC->A	GCT->A	synonymous	hypothetical protein
675	BruAb1_1405	N	1381954	1380548	54	1381901	T	C	GCA->A	GCG->A	synonymous	oxidoreductase
676	BruAb1_1413	N	1389284	1391110	279	1389562	G	A	AAG->K	AAA->K	synonymous	aminopeptidase
677	BruAb1_1414	N	1391815	1391111	527	1391289	G	A	ACG->T	ATG->M	non-synonymous	hypothetical protein
678	BruAb1_1419	N	1397982	1397122	614	1397369	G	A	GCG->A	GTG->V	non-synonymous	UDP-3-O-[3-hydroxymyristoyl] N-acetylglucosamine deacetylase
679	BruAb1_1422	N	1402504	1401638	582	1401923	C	T	TTG->L	TTA->L	synonymous	cell division protein FtsQ
680	BruAb1_1424	N	1404698	1403730	195	1404504	T	C	CCA->P	CCG->P	synonymous	UDP-N-acetylenolpyruvoylglucosamine reductase
681	BruAb1_1430	N	1412603	1411158	704	1411900	T	G	AAG->K	ACG->T	non-synonymous	UDP-N-acetylmuramoylalanyl-D-glutamyl-2,6-diaminopimelate--D-alanyl-D-alanyl ligase
682	BruAb1_1448	N	1430647	1429322	702	1429946	G	T	GGC->G	GGA->G	synonymous	metabolite-proton symporter
683	BruAb1_1453	N	1434067	1435011	25	1434091	C	G	CTG->L	GTG->V	non-synonymous	hypothetical protein
684	BruAb1_1460	N	1441293	1440232	61	1441233	C	T	GCC->A	ACC->T	non-synonymous	hypothetical protein
685	BruAb1_1463	N	1443207	1442104	29	1443179	G	A	TCA->S	TTA->L	non-synonymous	choloylglycine hydrolase family protein
686	BruAb1_1467	N	1445486	1445839	104	1445589	G	A	GGT->G	GAT->D	non-synonymous	hypothetical protein
687	BruAb1_1474	N	1452216	1450198	259	1451958	A	G	TGC->C	CGC->R	non-synonymous	RNA polymerase sigma factor RpoD
688	BruAb1_1475	N	1454651	1452684	311	1454341	G	T	GCC->A	GAC->D	non-synonymous	DNA primase
689	BruAb1_1476	N	1455021	1456697	30	1455050	G	T	CTG->L	CTT->L	synonymous	Na/Pi-cotransporter family protein
690	BruAb1_1480	N	1460552	1460034	129	1460424	C	G	CTG->L	CTC->L	synonymous	hypothetical protein
691	BruAb1_1482	N	1461672	1465160	357	1462028	G	A	AAG->K	AAA->K	synonymous	carbamoyl phosphate synthase large subunit
692	BruAb1_1500	N	1480154	1479804	279	1479876	T	C	GAA->E	GAG->E	synonymous	hypothetical protein
693	BruAb1_1508	N	1488904	1488248	394	1488511	A	G	TAT->Y	CAT->H	non-synonymous	metallo-beta-lactamase family protein
694	BruAb1_1511	N	1489921	1490460	159	1490079	T	C	CAT->H	CAC->H	synonymous	MarR family transcriptional regulator
695	BruAb1_1517	N	1495106	1495951	636	1495741	A	G	AAA->K	AAG->K	synonymous	prolipoprotein diacylglyceryl transferase
696	BruAb1_1522	N	1500282	1501214	141	1500422	C	T	GGC->G	GGT->G	synonymous	ribose-phosphate pyrophosphokinase
697	BruAb1_1527	N	1506252	1506752	374	1506625	T	C	GTC->V	GCC->A	non-synonymous	acyl dehydratase MaoC
698	BruAb1_1533	N	1513042	1511177	137	1512906	A	C	CTT->L	CGT->R	non-synonymous	ABC transporter ATP-binding protein/permease
699	BruAb1_1534	N	1515067	1513199	1611	1513457	G	A	CTC->L	CTT->L	synonymous	ABC transporter ATP-binding protein
700	BruAb1_1535	N	1515200	1515679	270	1515469	C	A	ACC->T	ACA->T	synonymous	RNA methyltransferase
701	BruAb1_1539	N	1517492	1518403	135	1517626	C	T	GGC->G	GGT->G	synonymous	coproporphyrinogen III oxidase
702	BruAb1_1547	N	1524573	1527419	417	1524989	C	T	GCC->A	GCT->A	synonymous	hypothetical protein
703	BruAb1_1549	N	1530126	1529620	339	1529788	C	G	ATG->M	ATC->I	non-synonymous	acetyltransferase
704	BruAb1_1551	N	1531561	1532244	574	1532134	T	C	TTC->F	CTC->L	non-synonymous	hypothetical protein
705	BruAb1_1555	N	1535612	1533945	603	1535010	G	A	GAC->D	GAT->D	synonymous	2-isopropylmalate synthase
706	BruAb1_1558	Y	1539550	1537355	1206	1538345	G	A	GGC->G	GGT->G	synonymous	anthranilate synthase
707	BruAb1_1566	N	1545225	1546193	30	1545254	A	G	ACA->T	ACG->T	synonymous	glycine betaine/L-proline ABC transporter periplasmic glycine betaine-binding protein
708	BruAb1_1567	N	1546282	1547118	580	1546861	A	G	ACG->T	GCG->A	non-synonymous	glycine betaine/L-proline ABC transporter permease
709	BruAb1_1570	N	1550301	1549453	170	1550132	A	G	CTA->L	CCA->P	non-synonymous	dipeptide ABC transporter ATP-binding protein
710	BruAb1_1571	N	1551215	1550307	478	1550738	A	G	TCG->S	CCG->P	non-synonymous	dipeptide ABC transporter permease
711	BruAb1_1575	N	1555040	1554813	53	1554988	G	T	ACA->T	AAA->K	non-synonymous	hypothetical protein
712	BruAb1_1577	N	1555407	1556237	797	1556203	A	G	GAC->D	GGC->G	non-synonymous	RNA methyltransferase
713	BruAb1_1578	Y	1557655	1556459	1134	1556522	C	A	GAG->E	GAT->D	non-synonymous	tRNA-specific 2-thiouridylase MnmA
714	BruAb1_1582	N	1559714	1558779	85	1559630	G	T	CGC->R	AGC->S	non-synonymous	hypothetical protein
715	BruAb1_1589	N	1565639	1564683	336	1565304	A	G	CGT->R	CGC->R	synonymous	Gfo/Idh/MocA family oxidoreductase
716	BruAb1_1595	N	1571846	1573783	652	1572497	G	A	GGC->G	AGC->S	non-synonymous	AsmA family protein
717	BruAb1_1596	N	1574612	1573791	462	1574151	G	A	CTC->L	CTT->L	synonymous	spermidine/putrescine ABC transporter permease
718	BruAb1_1598	N	1576685	1575540	637	1576049	G	T	CAG->Q	AAG->K	non-synonymous	spermidine/putrescine ABC transporter ATP-binding protein
719	BruAb1_1599	N	1578030	1576927	227	1577804	T	C	AAC->N	AGC->S	non-synonymous	spermidine/putrescine ABC transporter periplasmic spermidine/putrescine-binding protein
720	BruAb1_1602	N	1581237	1581473	213	1581449	C	G	CCC->P	CCG->P	synonymous	hypothetical protein
721	BruAb1_1609	N	1588961	1587411	27	1588935	C	T	ACG->T	ACA->T	synonymous	hypothetical protein
722	BruAb1_1617	N	1595478	1594705	554	1594925	T	C	GAC->D	GGC->G	non-synonymous	short chain dehydrogenase
723	BruAb1_1618	N	1596556	1595567	224	1596333	C	T	CGG->R	CAG->Q	non-synonymous	LacI family sugar-binding transcriptional regulator
724	BruAb1_1620	N	1599310	1597832	427	1598884	G	A	CCT->P	TCT->S	non-synonymous	ribose ABC transporter ATP-binding protein
725	BruAb1_1636	N	1614970	1617156	154	1615123	A	G	ACA->T	GCA->A	non-synonymous	malate synthase G
726	BruAb1_1640	Y	1620416	1620892	225	1620640	T	G	CCT->P	CCG->P	synonymous	hypothetical protein
727	BruAb1_1647	N	1627384	1626965	1	1627384	T	G	ATG->M	CTG->L	non-synonymous	hypothetical protein
728	BruAb1_1653	N	1629546	1630469	453	1629998	T	C	TTT->F	TTC->F	synonymous	biopolymer transport protein ExbB
729	BruAb1_1656	N	1632606	1631860	43	1632564	T	C	ACC->T	GCC->A	non-synonymous	hypothetical protein
730	BruAb1_1673	N	1649131	1648175	522	1648610	C	T	CTG->L	CTA->L	synonymous	sodium/bile acid transporter family protein
731	BruAb1_1676	N	1653915	1651981	1206	1652710	T	C	GAA->E	GAG->E	synonymous	cell division protein FtsH FtsH
732	BruAb1_1680	N	1657782	1657276	38	1657745	G	A	GCT->A	GTT->V	non-synonymous	Pal family lipoprotein
733	BruAb1_1681	N	1658010	1657831	159	1657852	A	C	GAT->D	GAG->E	non-synonymous	hypothetical protein
734	BruAb1_1683	Y	1660527	1659457	996	1659532	C	T	CCG->P	CCA->P	synonymous	TolA protein
735	BruAb1_1687	N	1663605	1662565	489	1663117	C	A	CTG->L	CTT->L	synonymous	Holliday junction DNA helicase RuvB
736	BruAb1_1690	N	1665397	1664891	31	1665367	A	G	TGT->C	CGT->R	non-synonymous	hypothetical protein
737	BruAb1_1692	N	1667310	1667975	592	1667901	G	A	GCG->A	ACG->T	non-synonymous	thiamine-phosphate pyrophosphorylase
738	BruAb1_1698	Y	1671121	1672170	839	1671959	C	A	GCC->A	GAC->D	non-synonymous	hypothetical protein
739	BruAb1_1699	N	1672177	1673208	961	1673137	C	A	CTC->L	ATC->I	non-synonymous	hypothetical protein
740	BruAb1_1703	N	1676773	1677465	53	1676825	T	C	GTC->V	GCC->A	non-synonymous	GntR family transcriptional regulator
741	BruAb1_1706	N	1679397	1678654	547	1678851	A	G	TCC->S	CCC->P	non-synonymous	hypothetical protein
742	BruAb1_1719	N	1690201	1690902	333	1690533	A	G	AAA->K	AAG->K	synonymous	transcriptional regulator
743	BruAb1_1730	N	1696852	1697940	1010	1697861	G	T	CGG->R	CTG->L	non-synonymous	phosphoribosylaminoimidazole carboxylase ATPase subunit
744	BruAb1_1738	N	1704576	1702759	1321	1703256	T	C	AAT->N	GAT->D	non-synonymous	ABC transporter ATP-binding protein
745	BruAb1_1741	N	1705798	1705142	172	1705627	G	A	CTT->L	TTT->F	non-synonymous	hypothetical protein
746	BruAb1_1744	N	1708734	1709459	218	1708951	T	C	CTG->L	CCG->P	non-synonymous	thiamine ABC transporter ATP-binding protein
747	BruAb1_1746	N	1709726	1711207	250	1709975	G	A	GTC->V	ATC->I	non-synonymous	peptidase
748	BruAb1_1747	N	1711234	1711962	329	1711562	C	A	ACG->T	AAG->K	non-synonymous	MOSC domain-containing protein
749	BruAb1_1748	N	1712985	1712050	45	1712941	G	A	AAC->N	AAT->N	synonymous	RNA polymerase factor sigma-32
750	BruAb1_1761	N	1724684	1723422	349	1724336	A	C	TCC->S	GCC->A	non-synonymous	4-hydroxy-3-methylbut-2-en-1-yl diphosphate synthase
751	BruAb1_1767	N	1733507	1732392	876	1732632	A	G	TTT->F	TTC->F	synonymous	branched chain amino-acid ABC transporter substrate-binding protein
752	BruAb1_1774	N	1740951	1739689	231	1740721	G	A	GAC->D	GAT->D	synonymous	D-amino acid dehydrogenase small subunit
753	BruAb1_1784	N	1751001	1748755	2039	1748963	C	T	TGT->C	TAT->Y	non-synonymous	primosome assembly protein PriA
754	BruAb1_1786	N	1752489	1751908	222	1752268	T	C	GTA->V	GTG->V	synonymous	hypothetical protein
755	BruAb1_1790	Y	1756813	1756526	106	1756708	G	C	CTT->L	GTT->V	non-synonymous	hypothetical protein
756	BruAb1_1796	N	1763975	1765591	1236	1765210	C	A	ACC->T	ACA->T	synonymous	bifunctional phosphoribosylaminoimidazolecarboxamide formyltransferase/IMP cyclohydrolase
757	BruAb1_1798	N	1772030	1767228	495	1771536	G	T	AGC->S	AGA->R	non-synonymous	hypothetical protein
758	BruAb1_1810	N	1780379	1780092	189	1780191	G	A	ATC->I	ATT->I	synonymous	hypothetical protein
759	BruAb1_1829	N	1797943	1797515	406	1797538	T	C	ACC->T	GCC->A	non-synonymous	50S ribosomal protein L21
760	BruAb1_1837	N	1805824	1805150	282	1805543	A	C	ACT->T	ACG->T	synonymous	hypothetical protein
761	BruAb1_1840	N	1812960	1814915	937	1813896	G	A	GGC->G	AGC->S	non-synonymous	M24/M37 family peptidase
762	BruAb1_1843	N	1819507	1816883	1816	1817692	G	A	CCC->P	TCC->S	non-synonymous	ATP-dependent Clp protease, ATP-binding subunit ClpB
763	BruAb1_1848	N	1822872	1821793	768	1822105	C	A	GTG->V	GTT->V	synonymous	peptide chain release factor 1
764	BruAb1_1852	N	1828787	1827852	691	1828097	T	A	ATC->I	TTC->F	non-synonymous	hypothetical protein
765	BruAb1_1858	N	1832476	1833714	721	1833196	A	G	AGC->S	GGC->G	non-synonymous	hypothetical protein
766	BruAb1_1865	N	1839472	1840551	553	1840024	A	G	ACT->T	GCT->A	non-synonymous	DNA-binding/iron metalloprotein/AP endonuclease
767	BruAb1_1866	N	1840548	1841528	816	1841363	T	G	CCT->P	CCG->P	synonymous	NAD(P)H-dependent glycerol-3-phosphate dehydrogenase
768	BruAb1_1869	N	1842261	1842917	547	1842807	A	G	ACC->T	GCC->A	non-synonymous	hypothetical protein
769	BruAb1_1872	N	1848055	1845491	1758	1846298	A	G	GGT->G	GGC->G	synonymous	DNA translocase FtsK
770	BruAb1_1889	N	1862859	1863524	474	1863332	A	G	TTA->L	TTG->L	synonymous	ArsR family transcriptional regulator
771	BruAb1_1891	N	1864959	1864390	402	1864558	T	C	TTA->L	TTG->L	synonymous	16S rRNA-processing protein RimM
772	BruAb1_1899	N	1874979	1871965	2620	1872360	T	C	AAA->K	GAA->E	non-synonymous	2-oxoglutarate dehydrogenase E1
773	BruAb1_1901	N	1876159	1875257	897	1875263	C	T	AAG->K	AAA->K	synonymous	succinyl-CoA synthetase subunit alpha
774	BruAb1_1905	N	1880059	1878896	463	1879597	C	T	GCC->A	ACC->T	non-synonymous	hypothetical protein
775	BruAb1_1908	N	1881076	1881987	797	1881872	T	A	ATG->M	AAG->K	non-synonymous	diaminopimelate epimerase
776	BruAb1_1909	N	1881987	1883270	1029	1883015	G	A	CAG->Q	CAA->Q	synonymous	hypothetical protein
777	BruAb1_1912	Y	1885384	1886157	190	1885573	G	A	GTC->V	ATC->I	non-synonymous	hydroxyacylglutathione hydrolase
778	BruAb1_1916	N	1888384	1887593	780	1887605	A	C	AAT->N	AAG->K	non-synonymous	acetyltransferase
779	BruAb1_1919	N	1891116	1890121	332	1890785	G	A	GCT->A	GTT->V	non-synonymous	peptidyl-prolyl cis-trans isomerase
780	BruAb1_1923	N	1894685	1895971	1207	1895891	C	T	CAG->Q	TAG->*	non-synonymous	hypothetical protein
781	BruAb1_1927	N	1899911	1898928	279	1899633	G	C	ACC->T	ACG->T	synonymous	LysR family transcriptional regulator
782	BruAb1_1928	N	1900136	1899951	126	1900011	G	A	TGC->C	TGT->C	synonymous	hypothetical protein
783	BruAb1_1929	N	1900202	1901047	156	1900357	T	C	TTT->F	TTC->F	synonymous	amino acid ABC transporter substrate-binding protein
784	BruAb1_1946	N	1917425	1916496	678	1916748	T	C	GCA->A	GCG->A	synonymous	electron transfer flavoprotein subunit alpha
785	BruAb1_1951	N	1921202	1920615	108	1921095	G	C	GGC->G	GGG->G	synonymous	ATP:cob(I)alamin adenosyltransferase
786	BruAb1_1953	N	1922279	1921437	537	1921743	A	G	ATT->I	ATC->I	synonymous	short chain dehydrogenase
787	BruAb1_1983	N	1946527	1946826	201	1946727	A	G	ATA->I	ATG->M	non-synonymous	hypothetical protein
788	BruAb1_1985	N	1949450	1948371	955	1948496	C	A	GTG->V	TTG->L	non-synonymous	hypothetical protein
789	BruAb1_1994	N	1962575	1963324	651	1963225	A	G	AAA->K	AAG->K	synonymous	hypothetical protein
790	BruAb1_1995	N	1963351	1964436	204	1963554	G	A	GGG->G	GGA->G	synonymous	hypothetical protein
791	BruAb1_1996	N	1966510	1964609	1475	1965036	C	T	GGC->G	GAC->D	non-synonymous	cobalamin biosynthesis protein
792	BruAb1_2007	N	1973610	1974563	847	1974456	G	A	GCG->A	ACG->T	non-synonymous	acetyl-CoA carboxylase carboxyltransferase subunit alpha
793	BruAb1_2015	N	1981068	1981502	343	1981410	A	G	ATC->I	GTC->V	non-synonymous	hypothetical protein
794	BruAb1_2024	N	1991907	1990849	714	1991194	A	C	CGT->R	CGG->R	synonymous	LacI family transcriptional regulator
795	BruAb1_2026	N	1994383	1993361	460	1993924	C	A	GTT->V	TTT->F	non-synonymous	luciferase family protein
796	BruAb1_2031	N	1997142	1997936	746	1997887	A	G	CAC->H	CGC->R	non-synonymous	ABC transporter ATP-binding protein
797	BruAb1_2034	N	2000957	2000160	514	2000444	T	C	AAT->N	GAT->D	non-synonymous	chromosome partitioning protein
798	BruAb1_2036	N	2003558	2001648	806	2002753	C	A	AGT->S	ATT->I	non-synonymous	tRNA uridine 5-carboxymethylaminomethyl modification protein GidA
799	BruAb1_2038	N	2005228	2007228	1734	2006961	A	C	ATA->I	ATC->I	synonymous	hypothetical protein
800	BruAb1_2039	N	2008578	2007313	231	2008348	G	A	CCC->P	CCT->P	synonymous	transcription termination factor Rho
801	BruAb1_2041	N	2010518	2009493	1020	2009499	T	C	AAA->K	AAG->K	synonymous	uroporphyrinogen decarboxylase
802	BruAb1_2043	N	2011807	2012406	566	2012372	C	T	GCC->A	GTC->V	non-synonymous	Maf-like protein
803	BruAb1_2046	N	2013909	2014613	502	2014410	G	T	GGC->G	TGC->C	non-synonymous	DNA polymerase III subunit epsilon
804	BruAb1_2049	N	2015996	2016691	604	2016599	A	G	ATG->M	GTG->V	non-synonymous	hypothetical protein
805	BruAb1_2053	N	2019787	2018858	624	2019164	G	C	CTC->L	CTG->L	synonymous	hypothetical protein
806	BruAb1_2054	N	2021328	2020024	1170	2020159	T	C	ATA->I	ATG->M	non-synonymous	ATP-dependent protease ATP-binding subunit HslU
807	BruAb1_2055	N	2021956	2021402	178	2021779	T	C	ACG->T	GCG->A	non-synonymous	ATP-dependent protease peptidase subunit
808	BruAb1_2058	N	2023483	2024133	197	2023679	C	T	GCA->A	GTA->V	non-synonymous	imidazole glycerol phosphate synthase subunit HisH
809	BruAb1_2061	N	2025787	2026110	228	2026014	T	A	AAT->N	AAA->K	non-synonymous	phosphoribosyl-ATP pyrophosphatase
810	BruAb1_2074	N	2035921	2038500	1116	2037036	C	G	CTC->L	CTG->L	synonymous	sensory box histidine kinase
811	BruAb1_2078	N	2043926	2047468	845	2044770	C	T	GCG->A	GTG->V	non-synonymous	UvrD/REP helicase
812	BruAb1_2082	N	2050263	2049358	472	2049792	A	G	TTC->F	CTC->L	non-synonymous	acetyl-CoA carboxylase subunit beta
813	BruAb1_2093	N	2058627	2059241	49	2058675	A	G	ACG->T	GCG->A	non-synonymous	nickel-cobalt-cadmium resistance protein
814	BruAb1_2098	N	2062340	2064754	2373	2064712	C	T	GTC->V	GTT->V	synonymous	phenylalanyl-tRNA synthetase subunit beta
815	BruAb1_2099	N	2064824	2065810	126	2064949	A	G	GCA->A	GCG->A	synonymous	Gfo/Idh/MocA family oxidoreductase
816	BruAb1_2100	N	2066036	2067949	351	2066386	T	C	GCT->A	GCC->A	synonymous	molecular chaperone DnaK
817	BruAb1_2105	N	2072222	2071347	766	2071457	A	C	TCA->S	GCA->A	non-synonymous	Smp-30/Cgr1 family protein
818	BruAb1_2108	N	2075718	2075098	369	2075350	T	G	CGA->R	CGC->R	synonymous	hypothetical protein
819	BruAb1_2111	N	2076678	2076899	54	2076731	T	C	CGT->R	CGC->R	synonymous	hypothetical protein
820	BruAb1_2129	N	2093126	2093641	461	2093586	C	T	GCT->A	GTT->V	non-synonymous	hypothetical protein
821	BruAb1_2135	N	2099287	2099946	629	2099915	T	C	GTC->V	GCC->A	non-synonymous	hypothetical protein
822	BruAb1_2141	N	2107481	2107750	239	2107719	C	G	GCG->A	GGG->G	non-synonymous	30S ribosomal protein S15
823	BruAb1_2142	N	2108034	2110178	595	2108628	G	A	GAT->D	AAT->N	non-synonymous	polynucleotide phosphorylase
824	BruAb1_2154	N	2121093	2119711	475	2120619	C	T	GTG->V	ATG->M	non-synonymous	cytosol aminopeptidase
825	BruAb2_0007	N	4910	4131	390	4521	A	G	GTT->V	GTC->V	synonymous	ABC transporter permease
826	BruAb2_0009	N	7619	6048	875	6745	C	T	AGT->S	AAT->N	non-synonymous	ABC transporter ATP-binding protein
827	BruAb2_0011	N	8972	9580	161	9132	C	T	GCG->A	GTG->V	non-synonymous	hypothetical protein
828	BruAb2_0024	N	20510	21925	222	20731	C	T	GCC->A	GCT->A	synonymous	branched chain amino-acid ABC transporter substrate-binding protein
829	BruAb2_0030	N	26186	26923	201	26386	G	A	GCG->A	GCA->A	synonymous	3-oxoacyl-ACP reductase
830	BruAb2_0032	N	27803	29992	137	27939	C	A	GCA->A	GAA->E	non-synonymous	acetoin dehydrogenase subunit alpha/beta
831	BruAb2_0033	N	30011	31276	437	30447	G	T	CGT->R	CTT->L	non-synonymous	branched-chain alpha-keto acid dehydrogenase subunit E2
832	BruAb2_0050	N	43973	44200	214	44186	C	T	CAT->H	TAT->Y	non-synonymous	hypothetical protein
833	BruAb2_0068	N	65879	65562	298	65582	C	A	GCC->A	TCC->S	non-synonymous	type IV secretion system protein VirB2
834	BruAb2_0069	N	67031	66315	622	66410	T	C	ACG->T	GCG->A	non-synonymous	type IV secretion system protein VirB1
835	BruAb2_0070	N	68773	67535	750	68024	C	T	ACG->T	ACA->T	synonymous	transglycosylase
836	BruAb2_0072	N	71657	70119	1403	70255	C	T	GGG->G	GAG->E	non-synonymous	hypothetical protein
837	BruAb2_0083	N	83622	85535	1097	84718	C	T	GCT->A	GTT->V	non-synonymous	hypothetical protein
838	BruAb2_0092	N	91600	91809	33	91632	A	G	CCA->P	CCG->P	synonymous	hypothetical protein
839	BruAb2_0096	N	94558	93854	212	94347	G	A	GCA->A	GTA->V	non-synonymous	hypothetical protein
840	BruAb2_0099	N	97285	98418	978	98262	C	T	GAC->D	GAT->D	synonymous	ornithine/DAP/arginine decarboxylase decarboxylase 2
841	BruAb2_0106	N	104285	105571	1190	105474	A	T	TAC->Y	TTC->F	non-synonymous	exopolysaccharide production protein
842	BruAb2_0107	N	105585	106721	518	106102	G	A	GGG->G	GAG->E	non-synonymous	Gfo/Idh/MocA family oxidoreductase
843	BruAb2_0110	N	110650	109589	163	110488	A	G	TCG->S	CCG->P	non-synonymous	spermidine/putrescine ABC transporter ATP-binding protein
844	BruAb2_0116	N	116766	117509	708	117473	A	G	GCA->A	GCG->A	synonymous	TetR family transcriptional regulator
845	BruAb2_0119	N	120239	119169	68	120172	T	A	CAG->Q	CTG->L	non-synonymous	flagellar biosynthesis protein FlhB
846	BruAb2_0153	N	145699	146259	523	146221	C	A	CAG->Q	AAG->K	non-synonymous	hypothetical protein
847	BruAb2_0154	N	146268	146984	670	146937	C	A	CAG->Q	AAG->K	non-synonymous	flagellar basal body L-ring protein
848	BruAb2_0173	N	165882	164962	436	165447	T	C	ATC->I	GTC->V	non-synonymous	LysR family transcriptional regulator
849	BruAb2_0174	N	166161	166042	62	166100	C	A	GGT->G	GTT->V	non-synonymous	hypothetical protein
850	BruAb2_0177	N	168982	170283	165	169146	C	A	ATC->I	ATA->I	synonymous	glycolate oxidase, iron-sulfur subunit
851	BruAb2_0185	N	178735	177497	327	178409	C	T	GCG->A	GCA->A	synonymous	glucose/galactose transporter
852	BruAb2_0196	N	185559	186506	855	186413	C	T	ATC->I	ATT->I	synonymous	bifunctional riboflavin kinase/FMN adenylyltransferase
853	BruAb2_0197	Y	186850	189768	2430	189279	C	T	ACC->T	ACT->T	synonymous	isoleucyl-tRNA synthetase
854	BruAb2_0201	N	192204	193949	702	192905	C	T	AGC->S	AGT->S	synonymous	RNA pseudouridylate synthase
855	BruAb2_0216	N	210976	209822	556	210421	T	C	ATT->I	GTT->V	non-synonymous	acyl-CoA dehydrogenase
856	BruAb2_0232	N	226529	227134	597	227125	C	T	GGC->G	GGT->G	synonymous	glutathione S-transferase
857	BruAb2_0233	N	227317	227703	289	227605	C	T	CCT->P	TCT->S	non-synonymous	extradiol ring-cleaving dioxygenase
858	BruAb2_0234	N	227856	228263	179	228034	T	C	ATG->M	ACG->T	non-synonymous	hypothetical protein
859	BruAb2_0258	N	253498	254244	707	254204	C	T	ACG->T	ATG->M	non-synonymous	hypothetical protein
860	BruAb2_0260	N	254896	256173	807	255702	T	C	CGT->R	CGC->R	synonymous	NAD(P) transhydrogenase subunit alpha
861	BruAb2_0275	N	269456	267858	231	269226	G	T	CTC->L	CTA->L	synonymous	GMC family oxidoreductase
862	BruAb2_0280	N	274148	272943	500	273649	C	T	TGC->C	TAC->Y	non-synonymous	branched chain amino-acid ABC transporter substrate-binding protein
863	BruAb2_0284	N	276234	279305	2966	279199	C	A	CCG->P	CAG->Q	non-synonymous	hypothetical protein
864	BruAb2_0285	N	279409	280428	304	279712	T	C	TGC->C	CGC->R	non-synonymous	amino acid ABC transporter substrate-binding protein
865	BruAb2_0292	N	286443	287378	811	287253	C	A	CTT->L	ATT->I	non-synonymous	D-galactose 1-dehydrogenase
866	BruAb2_0294	N	289295	290224	9	289303	T	A	GCT->A	GCA->A	synonymous	DgoK, 2-dehydro-3-deoxygalactonokinase
867	BruAb2_0300	N	296730	296107	181	296550	G	T	CGC->R	AGC->S	non-synonymous	hypothetical protein
868	BruAb2_0303	Y	300758	299223	1046	299713	G	A	GCT->A	GTT->V	non-synonymous	histidine ammonia-lyase
869	BruAb2_0308	Y	305795	306343	405	306199	C	A	CGC->R	CGA->R	synonymous	transcriptional regulator
870	BruAb2_0310	N	308851	307652	590	308262	G	A	ACG->T	ATG->M	non-synonymous	alanine racemase
871	BruAb2_0316	N	314805	315020	94	314898	C	A	CTA->L	ATA->I	non-synonymous	hypothetical protein
872	BruAb2_0319	N	317206	320280	972	318177	G	A	GTG->V	GTA->V	synonymous	AcrB/AcrD/AcrF multidrug efflux protein
873	BruAb2_0320	N	320425	321150	341	320765	C	T	TCG->S	TTG->L	non-synonymous	GntR family transcriptional regulator
874	BruAb2_0328	N	329491	330774	226	329716	G	A	GAT->D	AAT->N	non-synonymous	oxidoreductase
875	BruAb2_0335	N	337926	337501	257	337670	A	C	CTC->L	CGC->R	non-synonymous	hypothetical protein
876	BruAb2_0338	N	338921	339463	467	339387	C	T	GCT->A	GTT->V	non-synonymous	hypothetical protein
877	BruAb2_0343	N	343377	344429	124	343500	C	T	CCG->P	TCG->S	non-synonymous	Ada family regulatory protein
878	BruAb2_0354	N	354207	352159	1191	353017	C	T	GTG->V	GTA->V	synonymous	Dcp, peptidyl-dipeptidase Dcp
879	BruAb2_0360	N	359172	360194	969	360140	T	G	CTT->L	CTG->L	synonymous	fructose-1,6-bisphosphatase
880	BruAb2_0361	N	360225	361289	9	360233	T	C	CGT->R	CGC->R	synonymous	fructose-1,6-bisphosphate aldolase
881	BruAb2_0365	N	364408	363458	834	363575	T	C	GCA->A	GCG->A	synonymous	erythritol transcriptional regulator
882	BruAb2_0366	N	365368	364436	123	365246	A	G	TTT->F	TTC->F	synonymous	EryC, D-erythrulose-1-phosphate dehydrogenase
883	BruAb2_0382	N	383375	382929	82	383294	C	T	GCC->A	ACC->T	non-synonymous	hypothetical protein
884	BruAb2_0384	Y	384219	383785	150	384070	G	T	TCC->S	TCA->S	synonymous	IS711, transposase orfB
885	BruAb2_0401	N	399249	399112	5	399245	A	G	CTG->L	CCG->P	non-synonymous	hypothetical protein
886	BruAb2_0402	N	400276	399308	371	399906	C	T	GGC->G	GAC->D	non-synonymous	2-nitropropane dioxygenase
887	BruAb2_0406	N	402056	404611	996	403051	T	C	GCT->A	GCC->A	synonymous	DEAD/DEAH box helicase
888	BruAb2_0426	N	426602	428146	1318	427919	C	T	CCA->P	TCA->S	non-synonymous	UxaA family hydrolase
889	BruAb2_0430	N	431346	432218	211	431556	C	T	CAC->H	TAC->Y	non-synonymous	nickel transporter permease NikC
890	BruAb2_0441	N	443229	444188	600	443828	C	T	CGC->R	CGT->R	synonymous	hypothetical protein
891	BruAb2_0442	N	445931	444276	1410	444522	T	C	GCA->A	GCG->A	synonymous	lysyl-tRNA synthetase
892	BruAb2_0444	N	447257	446598	562	446696	G	A	CAT->H	TAT->Y	non-synonymous	carbonic anhydrase
893	BruAb2_0446	N	448105	449718	730	448834	G	A	GCG->A	ACG->T	non-synonymous	peptide ABC transporter substrate-binding protein
894	BruAb2_0448	N	450731	451561	753	451483	G	A	CTG->L	CTA->L	synonymous	peptide ABC transporter permease
895	BruAb2_0450	N	453963	453148	94	453870	A	C	TTC->F	GTC->V	non-synonymous	pyrroline-5-carboxylate reductase
896	BruAb2_0452	N	457098	455275	620	456479	G	A	GCG->A	GTG->V	non-synonymous	phosphogluconate dehydratase
897	BruAb2_0456	N	462008	460545	111	461898	G	A	TGC->C	TGT->C	synonymous	multi-drug resistance efflux protein
898	BruAb2_0458	N	463067	462327	677	462391	A	C	TTG->L	TGG->W	non-synonymous	AzlC family protein
899	BruAb2_0475	N	478575	478991	130	478704	G	T	GAT->D	TAT->Y	non-synonymous	hypothetical protein
900	BruAb2_0491	N	491759	491935	175	491933	T	G	TAA->*	GAA->E	non-synonymous	hypothetical protein
901	BruAb2_0499	N	499828	498461	197	499632	G	A	CCC->P	CTC->L	non-synonymous	glutamine synthetase
902	BruAb2_0500	N	500581	499892	540	500042	T	C	CCA->P	CCG->P	synonymous	hypothetical protein
903	BruAb2_0501	Y	500714	501658	311	501024	G	T	AGC->S	ATC->I	non-synonymous	transcriptional regulator
904	BruAb2_0504	N	503972	505075	469	504440	A	G	AAA->K	GAA->E	non-synonymous	glycine cleavage system aminomethyltransferase T
905	BruAb2_0506	N	505454	508252	496	505949	T	C	TTG->L	CTG->L	synonymous	glycine dehydrogenase
906	BruAb2_0508	N	509777	509283	19	509759	T	G	ATA->I	CTA->L	non-synonymous	proline dehydrogenase
907	BruAb2_0509	N	509940	513623	1417	511356	C	A	CCG->P	ACG->T	non-synonymous	bifunctional proline dehydrogenase/pyrroline-5-carboxylate dehydrogenase
908	BruAb2_0515	N	520864	519962	181	520684	C	T	GGG->G	AGG->R	non-synonymous	IolE protein
909	BruAb2_0518	N	525550	524720	575	524976	T	C	CAC->H	CGC->R	non-synonymous	SIS domain-containing protein
910	BruAb2_0519	N	525724	526728	136	525859	G	T	GCT->A	TCT->S	non-synonymous	myo-inositol 2-dehydrogenase IdhA
911	BruAb2_0524	N	531495	530215	813	530683	T	G	CGA->R	CGC->R	synonymous	major facilitator family transporter
912	BruAb2_0525	N	531749	532144	35	531783	A	T	AAG->K	ATG->M	non-synonymous	hypothetical protein
913	BruAb2_0529	N	536424	537527	729	537152	T	G	CTT->L	CTG->L	synonymous	iron ABC transporter ATP-binding protein
914	BruAb2_0531	N	538693	540462	1080	539772	G	A	GCG->A	GCA->A	synonymous	iron ABC transporter permease
915	BruAb2_0534	N	541565	542374	447	542011	T	C	GGT->G	GGC->G	synonymous	formate dehydrogenase accessory protein
916	BruAb2_0537	N	543738	545003	796	544533	G	A	GTC->V	ATC->I	non-synonymous	sugar ABC transporter periplasmic sugar-binding protein
917	BruAb2_0538	N	545111	546160	657	545767	G	T	GCG->A	GCT->A	synonymous	sugar ABC transporter permease
918	BruAb2_0540	N	547051	548172	51	547101	C	A	AGC->S	AGA->R	non-synonymous	ABC transporter ATP-binding protein
919	BruAb2_0548	N	559093	555482	1443	557651	G	A	TCC->S	TCT->S	synonymous	hydantoinase/oxoprolinase
920	BruAb2_0556	N	566120	565596	218	565903	C	T	GGT->G	GAT->D	non-synonymous	hypothetical protein
921	BruAb2_0559	N	569645	568614	603	569043	A	G	TTT->F	TTC->F	synonymous	aminotransferase
922	BruAb2_0560	N	570681	569764	885	569797	T	C	CCA->P	CCG->P	synonymous	hypothetical protein
923	BruAb2_0562	N	571263	571081	34	571230	C	G	GAA->E	CAA->Q	non-synonymous	hypothetical protein
924	BruAb2_0568	N	577485	576430	735	576751	G	C	AGC->S	AGG->R	non-synonymous	glycerol-3-phosphate transporter ATP-binding subunit
925	BruAb2_0571	N	580600	579299	441	580160	T	C	TCA->S	TCG->S	synonymous	glycerol-3-phosphate ABC transporter periplasmic glycerol-3-phosphate-binding protein
926	BruAb2_0572	N	581973	580933	565	581409	C	T	GCC->A	ACC->T	non-synonymous	dipeptidase
927	BruAb2_0573	N	582132	583877	740	582871	G	T	CGC->R	CTC->L	non-synonymous	Ade, adenine deaminase
928	BruAb2_0575	N	585340	584591	564	584777	T	C	GAA->E	GAG->E	synonymous	branched-chain amino acid ABC transporter ATP-binding protein
929	BruAb2_0580	N	590354	589737	311	590044	C	A	TGC->C	TTC->F	non-synonymous	protocatechuate 3,4-dioxygenase subunit alpha
930	BruAb2_0582	N	591509	591093	223	591287	G	A	CTG->L	TTG->L	synonymous	4-carboxymuconolactone decarboxylase
931	BruAb2_0584	N	592410	593318	427	592836	T	G	TTT->F	GTT->V	non-synonymous	transcriptional regulator PcaQ
932	BruAb2_0586	N	595012	595929	428	595439	G	A	CGC->R	CAC->H	non-synonymous	PobR
933	BruAb2_0588	N	596890	597597	128	597017	A	G	GAG->E	GGG->G	non-synonymous	3-oxoadipate CoA-transferase subunit A
934	BruAb2_0596	N	605152	606402	1203	606354	G	A	GCG->A	GCA->A	synonymous	amino acid dehydrogenase
935	BruAb2_0600	N	609148	608474	393	608756	A	G	GAT->D	GAC->D	synonymous	exonuclease
936	BruAb2_0609	N	615081	612892	422	614660	T	C	GAC->D	GGC->G	non-synonymous	hypothetical protein
937	BruAb2_0616	N	621515	620373	1056	620460	T	C	AAA->K	AAG->K	synonymous	major facilitator family transporter
938	BruAb2_0625	N	632321	631353	318	632004	A	G	GCT->A	GCC->A	synonymous	aspartate carbamoyltransferase
939	BruAb2_0635	N	641903	641100	221	641683	G	A	ACC->T	ATC->I	non-synonymous	lipoate-protein ligase B
940	BruAb2_0636	N	643407	642031	1146	642262	A	G	GGT->G	GGC->G	synonymous	sensory box protein
941	BruAb2_0637	N	643740	644240	280	644019	G	A	GGC->G	AGC->S	non-synonymous	hypothetical protein
942	BruAb2_0642	N	651255	653078	393	651647	G	A	GTG->V	GTA->V	synonymous	glucosamine--fructose-6-phosphate aminotransferase
943	BruAb2_0643	N	655353	653233	1045	654309	G	A	CCG->P	TCG->S	non-synonymous	ATP-dependent DNA helicase RecG
944	BruAb2_0647	Y	660643	659969	318	660326	G	T	CGC->R	CGA->R	synonymous	hypothetical protein
945	BruAb2_0652	N	665749	666549	753	666501	G	A	AAG->K	AAA->K	synonymous	phosphatidylcholine synthase
946	BruAb2_0654	N	667626	669188	1344	668969	G	A	GCG->A	GCA->A	synonymous	ABC transporter ATP-binding protein
947	BruAb2_0659	Y	674432	673947	24	674409	G	T	ATC->I	ATA->I	synonymous	bacterioferritin
948	BruAb2_0660	Y	674709	674398	301	674409	G	T	CGA->R	AGA->R	synonymous	hypothetical protein
949	BruAb2_0665	N	678405	678770	75	678479	G	A	CCG->P	CCA->P	synonymous	transposase orfA ISBm1, interruption-N
950	BruAb2_0669	N	681286	681891	187	681472	G	A	GAA->E	AAA->K	non-synonymous	IS66 family element, orf4
951	BruAb2_0672	N	682834	684057	631	683464	A	G	AGC->S	GGC->G	non-synonymous	AraC family transcriptional regulator
952	BruAb2_0680	N	691862	690849	428	691435	C	T	CGG->R	CAG->Q	non-synonymous	NAD-dependent epimerase/dehydratase
953	BruAb2_0693	N	703850	704872	381	704230	T	G	CTT->L	CTG->L	synonymous	D-aminopeptidase
954	BruAb2_0694	N	705167	707626	129	705295	C	T	CAC->H	CAT->H	synonymous	DNA translocase FtsK
955	BruAb2_0708	N	720544	721431	703	721246	G	C	GAA->E	CAA->Q	non-synonymous	hypothetical protein
956	BruAb2_0713	N	726986	725304	754	726233	C	T	GCG->A	ACG->T	non-synonymous	ABC transporter ATP-binding protein/permease
957	BruAb2_0717	N	730039	729677	277	729763	G	T	CTG->L	ATG->M	non-synonymous	monovalent cation/H+ antiporter subunit G
958	BruAb2_0723	N	737482	736154	202	737281	C	T	GAG->E	AAG->K	non-synonymous	hypothetical protein
959	BruAb2_0726	Y	738975	738457	504	738472	C	T	GCG->A	GCA->A	synonymous	molybdenum cofactor biosynthesis protein MogA
960	BruAb2_0731	N	740913	742049	991	741903	A	G	AGG->R	GGG->G	non-synonymous	8-amino-7-oxononanoate synthase
961	BruAb2_0737	N	745776	746696	525	746300	A	G	CCA->P	CCG->P	synonymous	homoserine O-succinyltransferase
962	BruAb2_0740	N	747690	749123	960	748649	T	C	TCT->S	TCC->S	synonymous	amino acid carrier protein
963	BruAb2_0747	N	753534	753169	177	753358	C	G	CAG->Q	CAC->H	non-synonymous	hypothetical protein
964	BruAb2_0748	N	753858	754574	153	754010	C	T	CTC->L	CTT->L	synonymous	transcriptional regulatory protein OmpR
965	BruAb2_0766	N	770222	769899	266	769957	G	A	GCA->A	GTA->V	non-synonymous	ArsR family transcriptional regulator
966	BruAb2_0768	N	772222	772716	154	772375	G	A	GTC->V	ATC->I	non-synonymous	peptide deformylase
967	BruAb2_0790	N	795713	794136	186	795528	C	T	GAG->E	GAA->E	synonymous	ROK family protein
968	BruAb2_0796	N	801061	802077	28	801088	G	A	GAG->E	AAG->K	non-synonymous	peptide ABC transporter ATP-binding protein
969	BruAb2_0798	N	804089	803100	779	803311	T	C	GAG->E	GGG->G	non-synonymous	Gfo/Idh/MocA family oxidoreductase
970	BruAb2_0799	N	805072	804077	505	804568	C	T	GTC->V	ATC->I	non-synonymous	oxidoreductase
971	BruAb2_0803	N	810811	809177	370	810442	C	T	GAT->D	AAT->N	non-synonymous	GMC family oxidoreductase
972	BruAb2_0809	N	817112	815901	1059	816054	C	T	CCG->P	CCA->P	synonymous	branched chain amino-acid ABC transporter substrate-binding protein
973	BruAb2_0824	N	832596	831307	879	831718	C	T	CTG->L	CTA->L	synonymous	Sun family protein
974	BruAb2_0827	Y	835231	833732	54	835178	G	A	AAC->N	AAT->N	synonymous	catalase KatA
975	BruAb2_0830	N	839194	837701	537	838658	G	A	GCC->A	GCT->A	synonymous	inosine 5'-monophosphate dehydrogenase
976	BruAb2_0831	N	839389	840744	882	840270	G	T	GGG->G	GGT->G	synonymous	voltage gated chloride channel family protein
977	BruAb2_0832	N	840866	841873	846	841711	T	C	ACT->T	ACC->T	synonymous	hypothetical protein
978	BruAb2_0834	N	843423	844838	1252	844674	G	A	GAA->E	AAA->K	non-synonymous	mannose-1-phosphate guanylyltransferase
979	BruAb2_0837	N	846636	848228	348	846983	A	T	GCA->A	GCT->A	synonymous	diguanylate phosphodiesterase
980	BruAb2_0840	N	849412	849068	6	849407	A	G	ATT->I	ATC->I	synonymous	acid-resistance protein
981	BruAb2_0842	N	852081	850549	247	851835	T	C	AGC->S	GGC->G	non-synonymous	glutamate/gamma-aminobutyrate antiporter
982	BruAb2_0846	N	854964	856199	681	855644	A	G	GCA->A	GCG->A	synonymous	HlyD family secretion protein
983	BruAb2_0851	N	861232	861053	146	861087	G	T	GCT->A	GAT->D	non-synonymous	hypothetical protein
984	BruAb2_0860	N	868863	868102	679	868185	C	T	GAG->E	AAG->K	non-synonymous	septum formation inhibitor
985	BruAb2_0879	N	883297	884313	546	883842	A	G	ATA->I	ATG->M	non-synonymous	sugar-binding protein
986	BruAb2_0881	N	885368	888172	2064	887431	G	T	TCG->S	TCT->S	synonymous	nitrite extrusion protein
987	BruAb2_0893	N	901355	901053	151	901205	T	G	AAA->K	CAA->Q	non-synonymous	hypothetical protein
988	BruAb2_0894	N	901382	902227	271	901652	A	C	AGC->S	CGC->R	non-synonymous	ABC transporter ATP-binding protein
989	BruAb2_0898	N	905887	905447	155	905733	C	T	GGC->G	GAC->D	non-synonymous	pseudoazurin
990	BruAb2_0900	N	907818	906838	740	907079	G	A	GCG->A	GTG->V	non-synonymous	NosX
991	BruAb2_0906	N	915884	913521	2037	913848	A	G	CGT->R	CGC->R	synonymous	transcriptional regulator NosR
992	BruAb2_0909	N	918433	918909	265	918697	G	A	GAA->E	AAA->K	non-synonymous	hypothetical protein
993	BruAb2_0910	N	918906	919571	301	919206	A	G	ACG->T	GCG->A	non-synonymous	hypothetical protein
994	BruAb2_0918	N	929027	928107	712	928316	C	A	GCC->A	TCC->S	non-synonymous	hypothetical protein
995	BruAb2_0921	N	931269	930646	332	930938	T	G	GAC->D	GCC->A	non-synonymous	hypothetical protein
996	BruAb2_0929	N	938625	937813	234	938392	G	A	ACC->T	ACT->T	synonymous	CbbQ/NirQ/NorQ/GpvN family protein
997	BruAb2_0931	Y	940543	940091	45	940499	G	A	TAC->Y	TAT->Y	synonymous	nitric-oxide reductase, small subunit
998	BruAb2_0941	N	946697	945996	91	946607	T	G	ATG->M	CTG->L	non-synonymous	GntR family transcriptional regulator
999	BruAb2_0950	N	955585	954725	607	954979	G	A	CTG->L	TTG->L	synonymous	peptide ABC transporter permease
1000	BruAb2_0958	N	963226	964293	296	963521	G	A	TGC->C	TAC->Y	non-synonymous	hypothetical protein
1001	BruAb2_0970	N	972903	972995	49	972951	G	A	GCG->A	ACG->T	non-synonymous	hypothetical protein
1002	BruAb2_0971	N	973035	974222	281	973315	A	C	GAA->E	GCA->A	non-synonymous	succinyl-diaminopimelate desuccinylase
1003	BruAb2_0985	N	984563	985759	436	984998	G	T	GCC->A	TCC->S	non-synonymous	(Fe-S)-binding protein
1004	BruAb2_0988	N	987806	988183	19	987824	A	G	ATC->I	GTC->V	non-synonymous	methylglyoxal synthase
1005	BruAb2_0989	N	988264	989295	466	988729	T	G	TTT->F	GTT->V	non-synonymous	glucokinase
1006	BruAb2_0990	N	989516	991351	942	990457	G	A	CTG->L	CTA->L	synonymous	ABC transporter ATP-binding protein/permease
1007	BruAb2_0993	N	993264	995015	234	993497	C	T	GAC->D	GAT->D	synonymous	hypothetical protein
1008	BruAb2_1006	N	1007778	1006969	129	1007650	G	A	GAC->D	GAT->D	synonymous	ubiquinone/menaquinone biosynthesis methyltransferase
1009	BruAb2_1007	N	1008089	1008715	34	1008122	A	C	AAG->K	CAG->Q	non-synonymous	uracil phosphoribosyltransferase
1010	BruAb2_1010	N	1010047	1009724	250	1009798	A	C	TGT->C	GGT->G	non-synonymous	hypothetical protein
1011	BruAb2_1014	N	1012146	1012877	699	1012844	T	C	GGT->G	GGC->G	synonymous	GntR family transcriptional regulator
1012	BruAb2_1018	N	1016849	1015845	262	1016588	G	A	CTC->L	TTC->F	non-synonymous	peptide ABC transporter ATP-binding protein
1013	BruAb2_1023	N	1020615	1021901	1261	1021875	G	A	GAG->E	AAG->K	non-synonymous	branched-chain alpha-keto acid dehydrogenase subunit E2
1014	BruAb2_1025	N	1025589	1023634	530	1025060	G	C	GCC->A	GGC->G	non-synonymous	dehydrogenase complex, E1 component, dehydrogenase
1015	BruAb2_1029	N	1029778	1032063	658	1030435	T	C	TAC->Y	CAC->H	non-synonymous	penicillin amidase
1016	BruAb2_1032	N	1034723	1035613	406	1035128	A	G	ATG->M	GTG->V	non-synonymous	peptide ABC transporter permease
1017	BruAb2_1036	N	1038618	1040174	26	1038643	A	G	CAT->H	CGT->R	non-synonymous	oligopeptide ABC transporter substrate-binding protein
1018	BruAb2_1040	N	1043039	1044016	5	1043043	T	C	ATA->I	ACA->T	non-synonymous	oligopeptide ABC transporter ATP-binding protein
1019	BruAb2_1042	N	1044903	1046321	1039	1045941	A	C	ATG->M	CTG->L	non-synonymous	amidase
1020	BruAb2_1046	N	1050189	1049113	765	1049425	G	A	GAC->D	GAT->D	synonymous	ABC transporter
1021	BruAb2_1058	N	1068291	1067089	63	1068229	A	C	CTT->L	CTG->L	synonymous	cobalamin synthesis protein/P47K family protein
1022	BruAb2_1067	N	1074489	1074082	176	1074314	A	C	ATT->I	AGT->S	non-synonymous	hypothetical protein
1023	BruAb2_1068	Y	1075264	1074497	693	1074572	C	A	GTG->V	GTT->V	synonymous	flagellar biosynthesis protein FliR
1024	BruAb2_1073	N	1079012	1078668	309	1078704	G	C	CTC->L	CTG->L	synonymous	flagellar biosynthesis regulatory protein FlaF
1025	BruAb2_1083	N	1090995	1089253	1007	1089989	A	G	ATG->M	ACG->T	non-synonymous	flagellar MS-ring protein
1026	BruAb2_1086	N	1104135	1103080	411	1103725	G	T	ATC->I	ATA->I	synonymous	hypothetical protein
1027	BruAb2_1092	N	1110363	1111769	750	1111112	T	C	GGT->G	GGC->G	synonymous	aldehyde dehydrogenase
1028	BruAb2_1093	N	1112735	1111926	792	1111944	C	T	CCG->P	CCA->P	synonymous	2,4-dihydroxyhept-2-ene-1,7-dioic acid aldolase
1029	BruAb2_1095	N	1114626	1113760	486	1114141	G	A	GGC->G	GGT->G	synonymous	fumarylacetoacetate hydrolase
1030	BruAb2_1096	N	1115675	1114695	485	1115191	A	G	TTC->F	TCC->S	non-synonymous	homoprotocatechuate 2,3-dioxygenase
1031	BruAb2_1097	N	1117244	1115730	159	1117086	T	C	GTA->V	GTG->V	synonymous	5-carboxy-2-hydroxymuconate semialdehyde dehydrogenase
1032	BruAb2_1100	N	1119372	1118353	385	1118988	T	C	ACA->T	GCA->A	non-synonymous	hypothetical protein
1033	BruAb2_1105	N	1124684	1123902	510	1124175	G	T	GAC->D	GAA->E	non-synonymous	IclR family transcriptional regulator
1034	BruAb2_1106	N	1124934	1126427	357	1125290	C	T	GCC->A	GCT->A	synonymous	amino acid permease
1035	BruAb2_1109	N	1129885	1131066	670	1130554	G	T	GGC->G	TGC->C	non-synonymous	branched chain amino-acid ABC transporter substrate-binding protein
1036	BruAb2_1125	N	1146920	1145796	833	1146088	A	G	GTG->V	GCG->A	non-synonymous	ROK family protein
"N" stands for SNPs identified to be conserved to ST2 B. abortus, "Y" means SNPs conserved to B. abortus 8416.

## Sheet: Table S3
Table S3 B. abortus 8416 specific and missing ORFs
Synonym		Product
BruAb1_0031	*	transglycosylase
BruAb1_0072	-	hypothetical protein
BruAb1_0075	*	amino acid efflux LysE family protein
BruAb1_0079	*	hypothetical protein
BruAb1_0112	*	CscK, fructokinase
BruAb1_0132	*	IS711, transposase orfB
BruAb1_0203	*	hypothetical protein
BruAb1_0237	*	hypothetical protein
BruAb1_0259	-	hypothetical protein
BruAb1_0284	*	phage integrase family site specific recombinase
BruAb1_0286	*	hypothetical protein
BruAb1_0290	*	hypothetical protein
BruAb1_0291	*	hypothetical protein
BruAb1_0292	*	hypothetical protein
BruAb1_0358	*	hypothetical protein
BruAb1_0364	*	hypothetical protein
BruAb1_0371	*	ABC transporter substrate-binding protein
BruAb1_0376	*	xanthine dehydrogenase
BruAb1_0405	*	hypothetical protein
BruAb1_0442	*	hypothetical protein
BruAb1_0448	*	hypothetical protein
BruAb1_0507	*	hypothetical protein
BruAb1_0550	*	IS711, transposase orfB
BruAb1_0573	*	hypothetical protein
BruAb1_0647	*	hypothetical protein
BruAb1_0650	*	hypothetical protein
BruAb1_0655	*	Omp2a, porin
BruAb1_0656	*	hypothetical protein
BruAb1_0662	*	hypothetical protein
BruAb1_0679	*	hypothetical protein
BruAb1_0707	*	hypothetical protein
BruAb1_0734	*	short chain dehydrogenase/reductase family oxidoreductase
BruAb1_0750	*	hypothetical protein
BruAb1_0755	*	hypothetical protein
BruAb1_0796	*	sugar transferase
BruAb1_0809	-	hypothetical protein
BruAb1_0835	-	hypothetical protein
BruAb1_0847	*	hypothetical protein
BruAb1_0859	*	hypothetical protein
BruAb1_0870	*	2-dehydro-3-deoxygluconokinase
BruAb1_0895	*	sec-independent translocase
BruAb1_0910	*	trigger factor
BruAb1_0930	*	hypothetical protein
BruAb1_0950	*	hypothetical protein
BruAb1_0984	*	IS711, transposase orfB
BruAb1_0993	*	hypothetical protein
BruAb1_0994	*	hypothetical protein
BruAb1_1014	*	hypothetical protein
BruAb1_1028	*	hypothetical protein
BruAb1_1042	*	hypothetical protein
BruAb1_1054	*	TrpR binding protein WrbA
BruAb1_1057	*	DEAD/DEAH box helicase
BruAb1_1093	*	luciferase family protein
BruAb1_1112	*	Lon, ATP-dependent protease La
BruAb1_1194	*	propionyl-CoA carboxylase subunit alpha
BruAb1_1245	*	hypothetical protein
BruAb1_1260	*	hypothetical protein
BruAb1_1280	*	hypothetical protein
BruAb1_1281	*	hypothetical protein
BruAb1_1339	*	hypothetical protein
BruAb1_1356	*	urease accessory protein UreE
BruAb1_1359	*	urease accessory protein UreD
BruAb1_1378	*	hypothetical protein
BruAb1_1402	*	hypothetical protein
BruAb1_1412	*	50S ribosomal protein L11 methyltransferase
BruAb1_1435	*	hypothetical protein
BruAb1_1449	*	hypothetical protein
BruAb1_1534	*	ABC transporter ATP-binding protein
BruAb1_1537	*	hypothetical protein
BruAb1_1590	*	hypothetical protein
BruAb1_1594	*	hypothetical protein
BruAb1_1611	*	hypothetical protein
BruAb1_1632	*	hypothetical protein
BruAb1_1633	*	hypothetical protein
BruAb1_1647	*	hypothetical protein
BruAb1_1650	*	hypothetical protein
BruAb1_1667	*	hypothetical protein
BruAb1_1694	*	hypothetical protein
BruAb1_1697	*	hypothetical protein
BruAb1_1711	*	hypothetical protein
BruAb1_1720	*	hypothetical protein
BruAb1_1735	-	hypothetical protein
BruAb1_1745	*	hypothetical protein
BruAb1_1765	-	branched chain amino-acid ABC transporter substrate-binding protein
BruAb1_1767	-	branched chain amino-acid ABC transporter substrate-binding protein
BruAb1_1777	*	hypothetical protein
BruAb1_1784	-	primosome assembly protein PriA
BruAb1_1803	*	30S ribosomal protein S16
BruAb1_1825	*	hypothetical protein
BruAb1_1860	*	hypothetical protein
BruAb1_1874	-	TesB, acyl-CoA thioesterase II
BruAb1_1886	*	hypothetical protein
BruAb1_1918	*	hypothetical protein
BruAb1_1925	*	hypothetical protein
BruAb1_1953	*	short chain dehydrogenase
BruAb1_1975	*	hypothetical protein
BruAb1_2099	*	Gfo/Idh/MocA family oxidoreductase
BruAb1_2109	*	hypothetical protein
BruAb2_0001	*	replication initiation protein RepC
BruAb2_0004	*	hypothetical protein
BruAb2_0007	*	ABC transporter permease
BruAb2_0034	*	shikimate dehydrogenase
BruAb2_0137	*	hypothetical protein
BruAb2_0164	*	hypothetical protein
BruAb2_0168	-	outermembrane transporter
BruAb2_0179	*	hypothetical protein
BruAb2_0193	*	hypothetical protein
BruAb2_0195	*	hypothetical protein
BruAb2_0203	*	protease
BruAb2_0257	*	hypothetical protein
BruAb2_0260	*	NAD(P) transhydrogenase subunit alpha
BruAb2_0284	*	hypothetical protein
BruAb2_0315	*	hypothetical protein
BruAb2_0375	*	hypothetical protein
BruAb2_0377	*	FAD-binding oxidoreductase
BruAb2_0378	*	hypothetical protein
BruAb2_0379	*	epimerase
BruAb2_0380	*	aminotransferase
BruAb2_0472	-	hypothetical protein
BruAb2_0485	*	hypothetical protein
BruAb2_0491	*	hypothetical protein
BruAb2_0507	*	hypothetical protein
BruAb2_0537	*	sugar ABC transporter periplasmic sugar-binding protein
BruAb2_0554	*	hypothetical protein
BruAb2_0559	-	aminotransferase
BruAb2_0581	*	protocatechuate 3,4-dioxygenase subunit beta
BruAb2_0605	*	hypothetical protein
BruAb2_0606	*	hypothetical protein
BruAb2_0616	*	major facilitator family transporter
BruAb2_0672	*	AraC family transcriptional regulator
BruAb2_0690	*	IS711, transposase orfB
BruAb2_0698	*	branched-chain alpha-keto acid dehydrogenase subunit E2
BruAb2_0700	*	2-oxoisovalerate dehydrogenase E1 component subunit alpha
BruAb2_0727	*	hypothetical protein
BruAb2_0755	*	taurine ABC transporter permease
BruAb2_0761	-	hypothetical protein
BruAb2_0802	*	aldehyde dehydrogenase
BruAb2_0839	*	hypothetical protein
BruAb2_0862	*	hypothetical protein
BruAb2_0933	*	cytochrome c oxidase subunit III
BruAb2_0937	*	hypothetical protein
BruAb2_0938	*	hypothetical protein
BruAb2_0970	*	hypothetical protein
BruAb2_1002	*	hypothetical protein
BruAb2_1081	*	flagellar motor protein MotB
BruAb2_1122	*	taurine ABC transporter taurine-binding protein
BruAb2_1136	*	hypothetical protein
BAB8416_I0012	§	ABC transporter, substrate-binding protein
BAB8416_I0020	£	Acetoacetyl-CoA synthetase [leucine]
BAB8416_I0021	£	Acetoacetyl-CoA synthetase [leucine]
BAB8416_I0032	£	Membrane-bound lytic murein transglycosylase B precursor
BAB8416_I0042	§	hypothetical protein
BAB8416_I0073	£	Outer membrane protein assembly factor YaeT precursor
BAB8416_I0076	£	Amino acid efflux protein
BAB8416_I0080	£	hypothetical protein
BAB8416_I0117	£	Fructokinase
BAB8416_I0209	£	ABC transporter atp-binding protein
BAB8416_I0294	§	Beta-ureidopropionase
BAB8416_I0357	£	TRAP transporter solute receptor, unknown substrate 6
BAB8416_I0362	£	Xanthine dehydrogenase, molybdenum binding subunit
BAB8416_I0475	§	conserved hypothetical protein in cyt c oxidase gene clusters
BAB8416_I0541	£	Xylulose kinase
BAB8416_I0592	§	Gene Transfer Agent FAD/FMN-containing dehydrogenase
BAB8416_I0623	§	hypothetical protein
BAB8416_I0630	£	ATP/GTP-binding site motif A (P-loop) :Porin, alpha proteobacteria type
BAB8416_I0707	£	3-oxoacyl-[acyl-carrier protein] reductase
BAB8416_I0723	£	hypothetical protein
BAB8416_I0733	§	Glutamate Aspartate periplasmic binding protein precursor GltI
BAB8416_I0771	£	Beta-galactosidase
BAB8416_I0776	§	Heme A synthase, cytochrome oxidase biogenesis protein Cox15-CtaA
BAB8416_I0778	§	Agmatinase
BAB8416_I0784	§	hypothetical protein
BAB8416_I0809	§	Prolyl-tRNA synthetase
BAB8416_I0815	§	Extensin family protein
BAB8416_I0842	§	2-dehydro-3-deoxygluconate kinase
BAB8416_I0853	§	Hypothetical protein VC0266 (sugar utilization related?)
BAB8416_I0867	£	Twin-arginine translocation protein TatB
BAB8416_I0885	£	Cell division trigger factor
BAB8416_I0903	§	hypothetical protein
BAB8416_I0907	§	hypothetical protein
BAB8416_I0994	§	hypothetical protein
BAB8416_I1024	£	procollagen, type VI, alpha 3
BAB8416_I1038	£	hypothetical protein
BAB8416_I1039	£	ATP-dependent RNA helicase RhlE
BAB8416_I1044	§	Diguanylate cyclase/phosphodiesterase domain 1 (GGDEF)
BAB8416_I1049	£	Multidrug resistance protein A
BAB8416_I1080	£	Luciferase-like monooxygenase, FMN-dependent
BAB8416_I1098	£	ATP-dependent protease La
BAB8416_I1176	£	Propionyl-CoA carboxylase biotin-containing subunit
BAB8416_I1198	£	LSU ribosomal protein L17p
BAB8416_I1256	£	Transporter
BAB8416_I1263	§	hypothetical protein
BAB8416_I1281	£	Phospholipase/carboxylesterase family protein
BAB8416_I1282	§	4-hydroxyphenylacetate 3-monooxygenase, reductase component
BAB8416_I1304	§	Butyryl-CoA dehydrogenase
BAB8416_I1350	£	Urease accessory protein UreF
BAB8416_I1352	£	Urease accessory protein UreD
BAB8416_I1398	§	hypothetical protein
BAB8416_I1408	§	Ribosomal protein L11 methyltransferase
BAB8416_I1415	§	hypothetical protein
BAB8416_I1431	§	hypothetical protein
BAB8416_I1533	§	Lipid A export ATP-binding/permease protein MsbA
BAB8416_I1535	£	Purine nucleoside permease
BAB8416_I1557	§	hypothetical protein
BAB8416_I1705	§	hypothetical protein
BAB8416_I1729	§	hypothetical protein
BAB8416_I1774	§	Helicase PriA essential for oriC/DnaA-independent DNA replication
BAB8416_I1787	§	Heparinase II/III-like
BAB8416_I1796	£	SSU ribosomal protein S16p
BAB8416_I1821	£	Immunoglobulin-binding protein EIBE
BAB8416_I1828	§	Mobile element protein
BAB8416_I1866	§	Acyl-CoA thioesterase II
BAB8416_I1895	§	hypothetical protein
BAB8416_I1917	£	Mlr3471 protein
BAB8416_I1939	§	hypothetical protein
BAB8416_I1976	£	intimin/invasin family protein
BAB8416_I2090	£	Predicted dehydrogenase
BAB8416_I2099	£	MG(2+) chelatase family protein / ComM-related protein
BAB8416_I2102	§	hypothetical protein
BAB8416_I2120	§	Phosphate starvation-inducible protein PhoH, predicted ATPase
BAB8416_I2140	§	3-hydroxyacyl-[acyl-carrier-protein] dehydratase, FabA form
BAB8416_II0002	§	hypothetical protein
BAB8416_II0004	§	FIG00450627: hypothetical protein
BAB8416_II0007	§	Nucleoside ABC transporter, permease protein 2
BAB8416_II0012	§	4'-phosphopantetheinyl transferase entD
BAB8416_II0035	£	Shikimate 5-dehydrogenase I alpha
BAB8416_II0036	£	hypothetical protein
BAB8416_II0112	£	hypothetical protein
BAB8416_II0161	§	hypothetical protein
BAB8416_II0163	£	Phage tail fibers
BAB8416_II0175	§	Uncharacterized protein, possibly including a L,D-transpeptidase domain
BAB8416_II0197	£	Predicted Zn-dependent peptidase
BAB8416_II0215	§	L-carnitine dehydratase/bile acid-inducible protein F
BAB8416_II0225	§	Diguanylate cyclase
BAB8416_II0234	§	Nitric oxide reductase activation protein NorE
BAB8416_II0253	£	Various polyols ABC transporter, ATP-binding component
BAB8416_II0361	£	Ketoglutarate semialdehyde dehydrogenase
BAB8416_II0370	§	Oligopeptide transport system permease protein OppB
BAB8416_II0375	§	Sialic acid-induced transmembrane protein YjhT(NanM), possible mutarotase
BAB8416_II0412	£	ABC transporter permease protein with unknown substrate
BAB8416_II0447	§	hypothetical protein
BAB8416_II0463	§	Branched-chain alpha-keto acid dehydrogenase, E1 component, alpha subunit
BAB8416_II0465	£	Dihydrolipoamide acyltransferase component of branched-chain alpha-keto acid dehydrogenase complex
BAB8416_II0488	£	Transcriptional regulator, AraC family
BAB8416_II0546	£	Transporter, MFS superfamily
BAB8416_II0569	§	Acetyl-CoA acetyltransferase
BAB8416_II0579	£	Protocatechuate 3,4-dioxygenase beta chain
BAB8416_II0600	§	Branched-chain amino acid aminotransferase
BAB8416_II0621	£	Glycerol-3-phosphate ABC transporter, periplasmic glycerol-3-phosphate-binding protein
BAB8416_II0624	§	hypothetical protein
BAB8416_II0670	£	L-proline glycine betaine ABC transport system permease protein ProV
BAB8416_II0689	§	Fusaric acid resistance protein FusB / Fusaric acid resistance protein FusC
BAB8416_II0780	£	Oxidoreductase, FAD-binding protein
BAB8416_II0797	§	Transcriptional regulator, DeoR family
BAB8416_II0819	§	hypothetical protein
BAB8416_II0832	§	Transcription accessory protein (S1 RNA-binding domain)
BAB8416_II0843	§	RND efflux membrane fusion protein
BAB8416_II0845	§	hypothetical protein
BAB8416_II0846	§	hypothetical protein
BAB8416_II0877	§	hypothetical protein
BAB8416_II0880	§	4-aminobutyrate aminotransferase
BAB8416_II0906	§	NAD(P) transhydrogenase alpha subunit
BAB8416_II0911	§	diguanylate cyclase/phosphodiesterase (GGDEF & EAL domains) with PAS/PAC sensor(s)
BAB8416_II0918	§	hypothetical protein
BAB8416_II0931	§	Ribose ABC transporter, periplasmic ribose-binding protein RbsB
BAB8416_II0938	£	hypothetical protein
BAB8416_II0941	§	Putative Heme-regulated two-component response regulator
BAB8416_II0942	§	L-2-hydroxyglutarate oxidase
BAB8416_II0997	§	hypothetical protein
BAB8416_II1025	§	Dipeptide transport periplamic dipeptide-binding protein DppA
BAB8416_II1045	£	hypothetical protein
BAB8416_II1062	£	Flagellar biosynthesis protein FlhA
BAB8416_II1076	£	Flagellar motor rotation protein MotB
BAB8416_II1099	£	Omega-amino acid--pyruvate aminotransferase
BAB8416_II1122	£	Choline-binding lipoprotein
BAB8416_II1135	£	Lead, cadmium, zinc and mercury transporting ATPase
“*” Stands for the ORFs that not only present intact in B. abortus 9-941 but also in the test genomes, “-” means the ORFs only present intact in B. abortus 9-941, “§” represent the ORFs present complete in both B. abortus 8416 and the test genomes, “£” stands for the ORFs only appeared complete in B. abortus 8416.

## Sheet: Table S4
Table S4 BLAST hits of RD1 region within B. abortus
Strains	NCBI Reference Sequence	Identity	Hit length	Ref.Start	Ref.End	E value
Brucella_abortus_strain_NCTC7471	NZ_UIGF01000001.1	100	7933	286761	294693	0
Brucella_abortus_strain_NCTC8038	NZ_UFTW01000001.1	100	7933	286931	294863	0
Brucella_abortus_strain_NCTC1478	NZ_UFTV01000001.1	100	7933	287606	295538	0
Brucella_abortus_strain_Br_As-2014/03_Contig01	NZ_SDWB01000001.1	100	7933	284083	292015	0
Brucella_abortus_strain_CIIMS-NV-4	NZ_CP025743.1	100	7933	287585	295517	0
Brucella_abortus_104M	NZ_CP009625.1	100	7933	287316	295248	0
Brucella_abortus_bv._2_str._86/8/59	NZ_CP007765.1	100	7933	307326	315258	0
Brucella_abortus_strain_BDW	NZ_CP007681.1	100	7933	1846112	1838180	0
Brucella_abortus_03-2770-11_adgfn-supercont1.1	NZ_AXMR01000001.1	100	7933	287506	295438	0
Brucella_abortus_01-4165_adgfs-supercont1.4	NZ_AXMP01000004.1	100	7933	209131	217063	0
Brucella_abortus_80-1399_isolate_1	NZ_ATHE01000002.1	100	7933	207118	215050	0
Brucella_abortus_82-2330_isolate_1_acTUs-supercont1.2	NZ_KE343224.1	100	7933	207117	215049	0
Brucella_abortus_87-2211_isolate_1_acTUp-supercont1.2	NZ_KE343220.1	100	7933	1836554	1828622	0
Brucella_abortus_89-0363_isolate_1_acTUr-supercont1.1	NZ_KE343215.1	100	7933	283991	291923	0
Brucella_abortus_B10-0973_isolate_1_acTUq-supercont1.2	NZ_ATGL01000002.1	100	7933	1836622	1828690	0
Brucella_abortus_B10-0018_isolate_1_acTUB-supercont1.2	NZ_ATGN01000002.1	100	7933	1836618	1828686	0
Brucella_abortus_01-0065_isolate_1_acTUw-supercont1.2	NZ_ATGO01000002.1	100	7933	1836623	1828691	0
Brucella_abortus_01-0585_isolate_1_acTUm-supercont1.1	NZ_ATGP01000001.1	100	7933	287583	295515	0
Brucella_abortus_01-0648_isolate_1_acTUu-supercont1.1	NZ_ATGQ01000001.1	100	7933	287503	295435	0
Brucella_abortus_94-1313_isolate_1_acTUy-supercont1.2	NZ_ATGR01000002.1	100	7933	206800	214732	0
Brucella_abortus_90-1280_isolate_2_acTUn-supercont1.1	NZ_ATGS01000001.1	100	7933	287719	295651	0
Brucella_abortus_90-0737_isolate_2_acTUD-supercont1.1	NZ_ATGT01000001.1	100	7933	287583	295515	0
Brucella_abortus_90-0775_isolate_4_acTUk-supercont1.2	NZ_ATGU01000002.1	100	7933	1836406	1828474	0
Brucella_abortus_90-0742_isolate_1	NZ_ATGV01000001.1	100	7933	283927	291859	0
Brucella_abortus_90-0962_isolate_1_acTUv-supercont1.1	NZ_ATGW01000001.1	100	7933	287657	295589	0
Brucella_abortus_87-0095_isolate_1_acTUA-supercont1.2	NZ_ATGZ01000002.1	100	7933	1836651	1828719	0
Brucella_abortus_85-1058_isolate_1_acTUE-supercont1.2	NZ_ATHA01000002.1	100	7933	207116	215048	0
Brucella_abortus_84-0928_isolate_1_acTUt-supercont1.1	NZ_ATHB01000001.1	100	7933	287663	295595	0
Brucella_abortus_82-3893_isolate_2	NZ_ATHC01000002.1	100	7933	207159	215091	0
Brucella_abortus_68-3396P_isolate_4_acTUz-supercont1.2	NZ_ATHG01000002.1	100	7933	1836354	1828422	0
Brucella_abortus_76-1413_isolate_1_acTUo-supercont1.1	NZ_ATHF01000001.1	100	7933	287520	295452	0
Brucella_abortus_I103_(UK3/01)_acqZf-supercont1.1	NZ_ASGX01000001.1	100	7933	209124	217056	0
Brucella_abortus_NI495a_acqxB-supercont1.2	NZ_KB850479.1	100	7933	209183	217115	0
Brucella_abortus_NI422_acqxr-supercont1.3	NZ_KB850476.1	100	7933	209154	217086	0
Brucella_abortus_NI352_acqxL-supercont1.2	NZ_KB850471.1	100	7933	251843	259775	0
Brucella_abortus_84/26_acxwD-supercont1.1	NZ_KB850382.1	100	7933	605073	613005	0
Brucella_abortus_64/81_acxwJ-supercont1.1	NZ_KB850339.1	100	7933	605575	613507	0
Brucella_abortus_64/108_acqZK-supercont1.1	NZ_KB850337.1	100	7933	209176	217108	0
Brucella_abortus_544_acxwL-supercont1.1	NZ_KB850274.1	100	7933	810634	818566	0
Brucella_abortus_225/65_acznr-supercont1.1	NZ_KB850251.1	100	7933	599268	607200	0
Brucella_abortus_NI649_acqxe-supercont1.2	NZ_AQMX01000002.1	100	7933	251373	259305	0
Brucella_abortus_NI645_acqxS-supercont1.3	NZ_AQMW01000003.1	100	7933	154907	162839	0
Brucella_abortus_NI633_acsSk-supercont1.2	NZ_AQMU01000002.1	100	7933	209110	217042	0
Brucella_abortus_NI613_acqwH-supercont1.3	NZ_AQMR01000003.1	100	7933	209187	217119	0
Brucella_abortus_NI622_acqwo-supercont1.1	NZ_AQMS01000001.1	100	7933	251795	259727	0
Brucella_abortus_NI639_acqwF-supercont1.2	NZ_AQMV01000002.1	100	7933	154910	162842	0
Brucella_abortus_NI593_acqxv-supercont1.2	NZ_AQMQ01000002.1	100	7933	209182	217114	0
Brucella_abortus_NI628_acqya-supercont1.3	NZ_AQMT01000003.1	100	7933	154903	162835	0
Brucella_abortus_NI518_acqxZ-supercont1.1	NZ_AQMP01000001.1	100	7933	616138	624070	0
Brucella_abortus_63/59_acsRO-supercont1.1	NZ_AQLJ01000001.1	100	7933	1759618	1767550	0
Brucella_abortus_CNGB_436_acsbZ-supercont1.1	NZ_AQLZ01000001.1	100	7933	1173847	1181779	0
Brucella_abortus_CNGB_308_acscm-supercont1.1	NZ_AQLY01000001.1	100	7933	206329	214261	0
Brucella_abortus_CNGB_1432_acsch-supercont1.1	NZ_AQLX01000001.1	100	7933	209146	217078	0
Brucella_abortus_CNGB_1011_acscw-supercont1.1	NZ_AQLW01000001.1	100	7933	1758352	1766284	0
Brucella_abortus_90/50_acqZL-supercont1.1	NZ_AQLU01000001.1	100	7933	207109	215041	0
Brucella_abortus_88/226_acqZE-supercont1.1	NZ_AQLT01000001.1	100	7933	209129	217061	0
Brucella_abortus_80/108_acsSp-supercont1.2	NZ_AQLP01000002.1	100	7933	209142	217074	0
Brucella_abortus_67/781_acqZr-supercont1.2	NZ_AQLM01000002.1	100	7933	209180	217112	0
Brucella_abortus_NI380_acqwU-supercont1.1	NZ_AQMM01000001.1	100	7933	207888	215820	0
Brucella_abortus_CNGB_966_acsco-supercont1.1	NZ_AQMC01000001.1	100	7933	254217	262149	0
Brucella_abortus_CNGB_759_acscu-supercont1.1	NZ_AQMB01000001.1	100	7933	251370	259302	0
Brucella_abortus_CNGB_752_acsbR-supercont1.1	NZ_AQMA01000001.1	100	7933	209329	217261	0
Brucella_abortus_RB51-AHVLA_acsci-supercont1.1	NZ_AQIE01000001.1	100	7933	254272	262204	0
Brucella_abortus_NI492_acqwX-supercont1.1	NZ_AQMO01000001.1	100	7933	251755	259687	0
Brucella_abortus_NI274_acqxP-supercont1.2	NZ_AQML01000002.1	100	7933	209198	217130	0
Brucella_abortus_F1/06_B1_acqZx-supercont1.3	NZ_AQMD01000003.1	100	7933	11554	19486	0
Brucella_abortus_F3/01-300_acqZj-supercont1.2	NZ_AQMF01000002.1	100	7933	209134	217066	0
Brucella_abortus_NI388_acqwP-supercont1.1	NZ_AQMN01000001.1	100	7933	209130	217062	0
Brucella_abortus_NI240_acqxD-supercont1.3	NZ_AQMK01000003.1	100	7933	209137	217069	0
Brucella_abortus_levi_gila_acqwz-supercont1.3	NZ_AQMI01000003.1	100	7933	209135	217067	0
Brucella_abortus_bv._1_str._NI259_supercont1.3	NZ_JH601131.1	100	7933	594955	602887	0
Brucella_abortus_bv._1_str._NI021_supercont1.1	NZ_JH601126.1	100	7933	1320185	1312253	0
Brucella_abortus_bv._1_str._NI016_supercont1.1	NZ_JH601123.1	100	7933	599158	607090	0
Brucella_abortus_bv._1_str._NI010_supercont1.1	NZ_JH601115.1	100	7933	604137	612069	0
Brucella_abortus_bv._1_str._NI474_supercont1.1	NZ_JH601112.1	100	7933	605388	613320	0
Brucella_abortus_bv._1_str._NI435a_supercont1.1	NZ_JH601105.1	100	7933	1319614	1311682	0
Brucella_abortus_str._2308_A_map_unlocalized_VBI00022_1	NZ_ACOR01000001.1	100	7933	283959	291891	0
Brucella_melitensis_biovar_Abortus_2308	NC_7618.1	100	7933	283952	291884	0
Brucella_abortus_S19	NC_10742.1	100	7933	285969	293901	0
Brucella_abortus_biovar_1_str._9-941	NC_6932.1	100	7933	287585	295517	0
Brucella_abortus_strain_A19	NZ_CP030751.1	99.99	7933	287706	295638	0
Brucella_abortus_89-2646-1238_adgfA-supercont1.3	NZ_AXNA01000003.1	99.99	7933	364633	356701	0
Brucella_abortus_B10-0091_isolate_1_acTUj-supercont1.1	NZ_KE340385.1	99.99	7933	287519	295451	0
Brucella_abortus_93/1_acqZD-supercont1.1	NZ_AQLV01000001.1	99.99	7933	260772	268704	0
Brucella_abortus_863/67_acqZv-supercont1.2	NZ_AQLR01000002.1	99.99	7933	135255	143187	0
Brucella_abortus_F3/07-1_acqZh-supercont1.1	NZ_AQMG01000001.1	99.99	7933	209158	217090	0
Brucella_abortus_strain_NCTC3605	NZ_UFUI01000001.1	99.99	7933	286876	294807	0
Brucella_abortus_strain_NCTC624	NZ_UFUE01000001.1	99.99	7933	286856	294787	0
Brucella_abortus_88/19_acqZm-supercont1.1	NZ_AQLS01000001.1	99.96	7933	208444	216376	0
Brucella_abortus_93/2_acxvZ-supercont1.1	NZ_KB976045.1	99.96	7933	599870	607801	0
Brucella_abortus_63/168_acqZH-supercont1.2	NZ_KB850297.1	99.95	7933	209105	217037	0
Brucella_abortus_strain_NCTC_10505_sequence	NZ_CP007700.1	99.95	7933	206716	214647	0
Brucella_abortus_strain_15074.1_scaffold3	NZ_LJDE01000003.1	99.94	7933	258338	250407	0
Brucella_abortus_99-9971-159_adgfM-supercont1.3	NZ_AXMV01000003.1	99.94	7933	135730	143661	0
Brucella_abortus_03-4923-239-D_adggg-supercont1.1	NZ_KI518476.1	99.94	7933	206440	214371	0
Brucella_abortus_F5/04-7_acsbQ-supercont1.1	NZ_KB850423.1	99.94	7933	135730	143661	0
Brucella_abortus_85/69_acsaL-supercont1.5	NZ_KB851252.1	99.95	7933	244739	236809	0
Brucella_abortus_65/157_acscs-supercont1.1	NZ_KB850342.1	99.94	7933	206831	214762	0
Brucella_abortus_80/102_acsbU-supercont1.2	NZ_AQLO01000002.1	99.94	7933	135618	143549	0
Brucella_abortus_LEVI237_acsbT-supercont1.1	NZ_AQMJ01000001.1	99.94	7933	135609	143540	0
Brucella_abortus_85/140_acsaK-supercont1.3	NZ_AQLQ01000003.1	99.94	7933	135690	143620	0
Brucella_abortus_bv._6_str._870	NZ_CP007709.1	99.92	7934	1606585	1598653	0
Brucella_abortus_F2/06-8_acqZG-supercont1.2	NZ_AQME01000002.1	99.89	7933	209176	217099	0
Brucella_abortus_strain_NCTC10093	NZ_UFTU01000002.1	99.87	7933	1189665	1181743	0
Brucella_abortus_strain_3196	NZ_CP007707.1	99.81	7944	256923	248981	0
Brucella_abortus_strain_63_75	NZ_CP007663.1	99.81	7944	52232	60174	0
Brucella_abortus_bv._9_str._C68	NZ_CP007705.1	99.81	7944	300032	307974	0
Brucella_abortus_877/67_acsaM-supercont1.2	NZ_KB850392.1	99.81	7944	135695	143637	0
Brucella_abortus_63/144_acxwS-supercont1.1	NZ_KB850286.1	99.81	7944	598658	606600	0
Brucella_abortus_64/122_acsaJ-supercont1.1	NZ_AQLK01000001.1	99.81	7944	135695	143637	0
Brucella_abortus_strain_BFY	NZ_CP007738.1	99.82	7933	1750245	1742316	0
Brucella_abortus_F6/05-3_acsca-supercont1.4	NZ_KB850438.1	99.82	7933	135285	143214	0
Brucella_abortus_strain_BER	NZ_CP007682.1	99.81	7933	1184873	1176945	0
Brucella_abortus_65/63_acxwU-supercont1.1	NZ_KB850348.1	100	7624	1	7624	0
Brucella_abortus_63/138_acxwH-supercont1.1	NZ_KB850290.1	99.79	7217	1	7216	0
Brucella_abortus_BC95_adbtD-supercont1.7	NZ_KI515679.1	99.93	7155	75448	82601	0
Brucella_abortus_F10/05-11_acxwj-supercont1.3	NZ_KB850416.1	100	6675	605276	611950	0
Brucella_abortus_bv._1_str._NI488_supercont1.3	NZ_JH601120.1	100	6675	603599	610273	0
Brucella_abortus_A13334	NC_16795.1	100	6675	6675	1	0
Brucella_abortus_strain_12183	NZ_LITW01000008.1	99.93	6675	136061	142734	0
Brucella_abortus_strain_1365.1	NZ_LITV01000008.1	99.93	6675	135685	142358	0
Brucella_abortus_strain_8486	NZ_LIUB01000008.1	99.93	6675	135724	142397	0
Brucella_abortus_67/93_acxvW-supercont1.4	NZ_KB850358.1	99.93	6675	605697	612370	0
Brucella_abortus_63/130_acxwC-supercont1.3	NZ_KB850284.1	99.93	6675	605404	612077	0
Brucella_abortus_F10/06-3_acxwf-supercont1.4	NZ_KB850421.1	99.93	6676	605034	611708	0
Brucella_abortus_355/78_acCtS-supercont1.3	NZ_KB851242.1	99.78	6686	604715	611399	0
Brucella_abortus_F1/06-B21_acxwO-supercont1.3	NZ_KB850412.1	99.81	6675	605162	611833	0
